# Supplementary material for: The Holistic Health Status of Chinese Homosexual and Bisexual Adults: A Scoping Review Protocol
Source: Research Square preprint supplement (doi:10.21203/rs.3.rs-107407/v1), 2020-11-18
Supplement: Supplementary file 1 [file 6e92c84e71112093f2c53eb5.docx]

# Summary of databases searching results

Searching Date: May 7-31, 2020

| **Search Date** | **Databases** | **Results** |
| --- | --- | --- |
| ***In English*** | | |
| May 7, 2020 | PubMed | 1,213 |
| May 12, 2020 | Web of Science (update) | 2,106 |
| May 8, 2020 | CINAHL Plus | 421 |
| May 8, 2020 | ScienceDirect | 140 |
| May 8, 2020 | Social Work Abstracts | 14 |
| May 8, 2020 | ProQuest searching of the 5 databases:   1. ProQuest Dissertations & Theses A&I 2. ProQuest Dissertations & Theses Global‎ 3. APA PsycInfo 4. Sociological Abstracts 5. Social Services Abstracts | 853 |
| May 8, 2020 | Scopus | 622 |
| May 8, 2020 | Cochrane library | 132 |
| May 12, 2020 | Joanna Briggs Institute EBP Database | 17 |
|  | Total search | 5,518 |
|  | Duplicate papers | 2,577 |
| May 31, 2020 | Updates via setting alerts | 14 |
|  | Total left to screen | 2,955 |
| ***In Simplified Chinese*** | | |
| May 9, 2020 | SinoMed (China Biological Medicine Database) | 1,655 |
| May 9, 2020 | CNKI (China National Knowledge Infrastructure) | 4,290 |
| May 9, 2020 | Wanfang Data | 750 |
| May 9, 2020 | CQ VIP | 643 |
|  | Total search | 7,338 |
|  | Duplicate papers | 1,642 |
|  | Total left to screen | 5,696 |
| ***In Traditional Chinese*** | | |
| May 9, 2020 | Taiwan citation index-humanities and social sciences | 321 |
| May 9, 2020 | Index to Taiwan periodical literature system | 41 |
| May 9, 2020 | Synergy of metadata resources in Taiwan (SMRT) | 84 |
| May 9, 2020 | National Digital Library of Theses and Dissertation in Taiwan | 1,495 |
|  | Total search | 1,941 |
|  | Duplicate papers | 11 |
|  | Total left to screen | 1,933 |

# Syntax of English literature search

## PubMed

| PubMed - May 7, 2020 | | |
| --- | --- | --- |
| Search | Query | Results |
| #1 | Homosexuality[Mesh Terms] OR Bisexuality[Mesh Terms] OR Sexual and Gender Minorities[Mesh Terms] | 33,679 |
| #2 | (gay[Title/Abstract] OR lesbian[Title/Abstract] OR homosexual*[Title/Abstract] OR non-heterosexual[Title/Abstract] OR homoerotic[Title/Abstract] OR homophile*[Title/Abstract] OR queer[Title/Abstract] OR same-sex attraction same gender love[Title/Abstract] OR same gender attraction[Title/Abstract] OR LGB*[Title/Abstract] OR GBL*[Title/Abstract]) OR (bisexual[Title/Abstract] OR bi-sexual[Title/Abstract] OR bi-gender[Title/Abstract] OR bigender[Title/Abstract] OR men who have sex with men[Title/Abstract] OR male who have sex with male[Title/Abstract] OR MSM[Title/Abstract] OR male-male sex[Title/Abstract] OR women who have sex with women[Title/Abstract] OR WSW[Title/Abstract] OR men who have sex with both men and women[Title/Abstract] OR MSMW[Title/Abstract]) | 29,725 |
| #3 | #1 OR #2 | 45,643 |
| #4 | (China OR Taiwan[MeSH Terms]) OR (Chinese[Title/Abstract] OR Taiwanese[Title/Abstract]) | 1,793,046 |
| #5 | ((((Health OR Health Services OR Holistic Health[MeSH Terms])) OR (Mental Health OR Emotions OR Mental Disorders OR Depression OR Stress, Psychological OR Social Stigma OR Social Discrimination OR Prejudice OR Homophobia OR Resilience, Psychological OR Self Concept OR Social Identification OR Identification, Psychological OR Gender Identity OR Psychosexual Development[MeSH Terms])) OR (Physical Fitness OR Sexual Health OR Reproductive Health OR Sexually Transmitted Diseases OR HIV OR Sarcoma, Kaposi OR Reproductive Tract Infections OR Female Urogenital Diseases OR Male Urogenital Diseases OR Sexual Behavior OR Sexual Partners OR Condoms OR Condoms, Female OR Libido OR Sexual Dysfunction, Physiological OR Orgasm OR Violence OR Sex Offenses[MeSH Terms])) OR (Quality of Life OR Social Support OR Psychology, Social OR Social Networking OR Marital Status OR Family Relations[MeSH Terms]) | 8,899,265 |
| #6 | (well being[Title/Abstract] OR self esteem[Title/Abstract] OR helpless[Title/Abstract] OR sexually transmitted infection ORrisk* behavior*[Title/Abstract] OR risk taking behavior[Title/Abstract] OR drug use[Title/Abstract] OR alcohol drinking[Title/Abstract] OR Human Immunodeficiency Virus[Title/Abstract] OR sexual compulsory[Title/Abstract] OR sexual addiction[Title/Abstract] OR gender identity violence[Title/Abstract]) | 151,182 |
| #7 | #5 OR #6 | 8,912,752 |
| #8 | #3 AND #4 AND #7 | 1,724 |
| #9 | Limited to publication between 2001-2020, Human studies and English language | 1,213 |


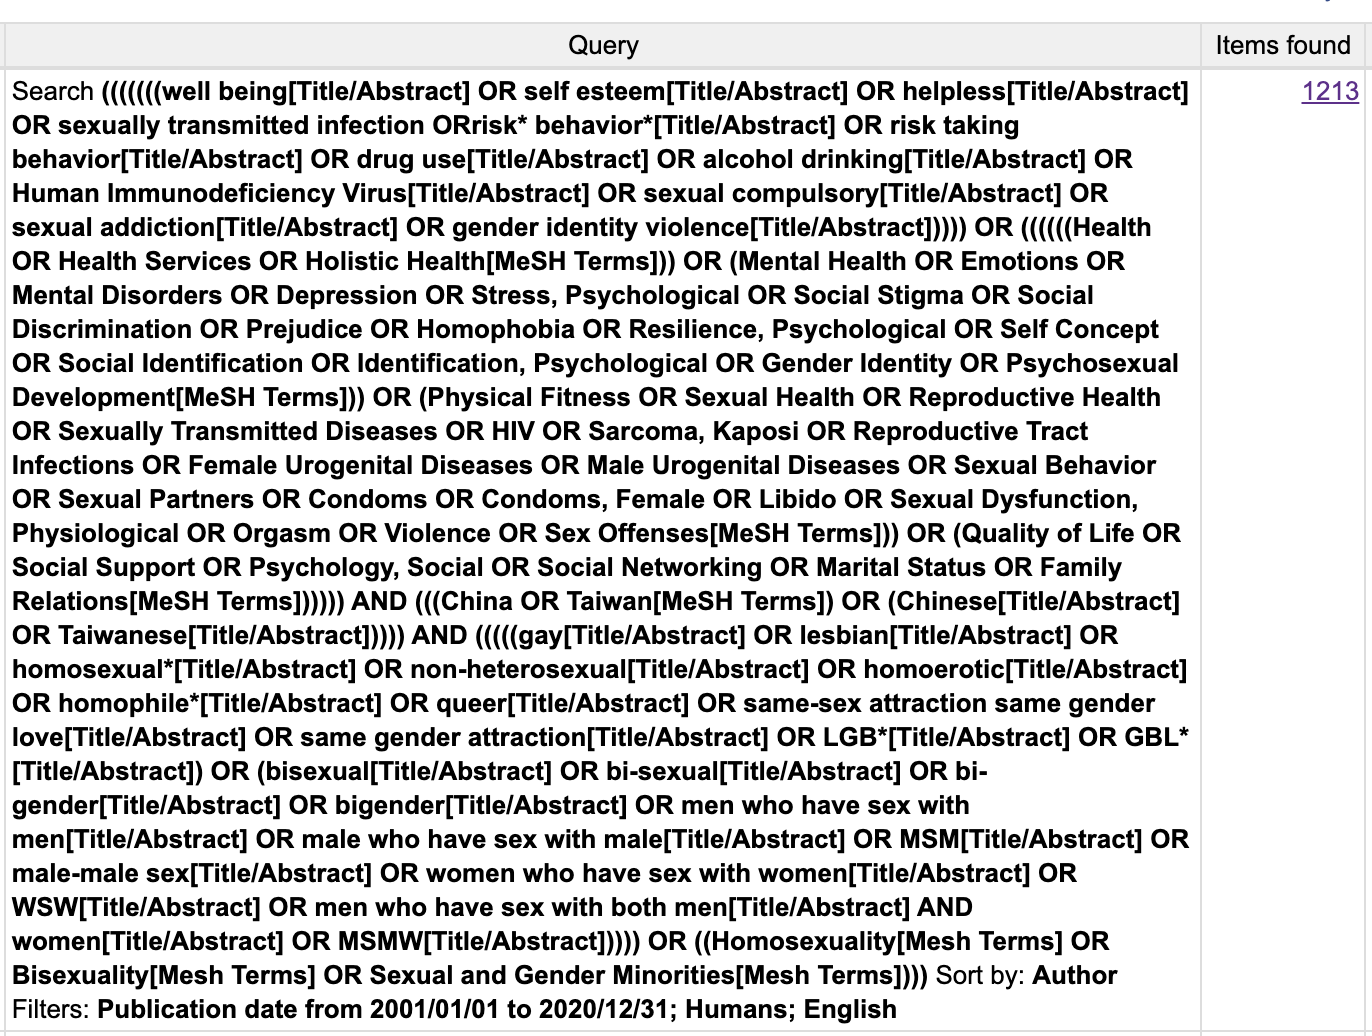


## Web of Science

| Web of Science - May 12, 2020 | | |
| --- | --- | --- |
| Search | Query | Results |
| #1 | TOPIC: (homosexuality OR gay OR lesbian OR homosexual OR homoerotic OR homophile OR bisexuality OR bisexual OR bigender OR MSM OR WSW OR MSMW OR LGB* OR GBL* OR queer) OR TOPIC: (sexual minorit*) OR TOPIC: (men who have sex with men) OR TOPIC: (women who have sex with women) OR TOPIC: (men who have sex with both men and women) | 105,088 |
| #2 | TOPIC: (China OR Chinese) OR TOPIC: (Taiwan OR Taiwanese) | 1,006,824 |
| #3 | TOPIC: (Health OR Health Service OR Holistic Health) OR TOPIC: (Mental Health OR Emotion OR Mental Disorder OR Depression OR Stress OR Stigma OR Discrimination OR Prejudice OR Homophobia OR Resilience OR Self Concept OR Identification OR Gender Identity OR Psychosexual Development) OR TOPIC: (Physical Health OR Sexual Health OR Reproductive Health OR Sexually Transmitted Diseases OR sexually transmitted infection OR HIV OR Human Immunodeficiency Virus OR Acquired Immunodeficiency Syndrome OR Chlamydia OR Gonorrhea OR Granuloma Inguinale OR Syphilis OR Condylomata Acuminata OR Herpes Genitalis OR Kaposi OR Reproductive Tract Infections OR Female Urogenital Disease OR Male Urogenital Disease OR Sexual Behavior OR Sexual Partner OR Condom OR Libido OR Sexual Dysfunction OR Orgasm OR Violence OR Abuse OR Suicide OR Sex Offense OR sexual compulsory OR sexual addiction OR gender identity violence OR Unsafe Sex OR Sexual Abstinence OR Sexual Harassment | 6,884,165 |
| #4 | #1 AND #2 AND #3 | 2,188 |
| #5 | Limited to publication between 2001-2020 and English language | 2,106 |


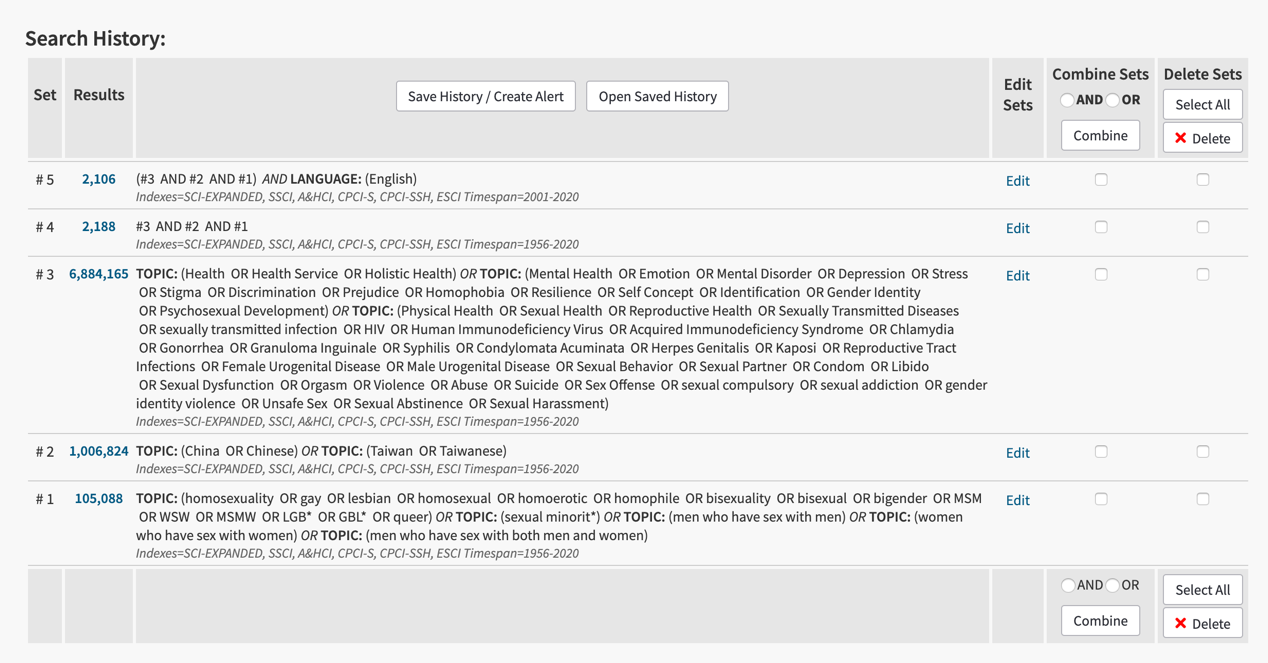


## CINAHL Plus (via EBSCOhost)

| CINAHL Plus (via EBSCOhost) – May 8, 2020 | | |
| --- | --- | --- |
| Search | Query | Results |
| #1 | SU ( homosexuality OR gay OR lesbian OR homosexual OR homoerotic OR homophile OR bisexuality OR bisexual OR bigender OR LGB* OR GBL* OR queer ) OR SU ( homosexuality OR gay OR lesbian OR homosexual OR homoerotic OR homophile OR bisexuality OR bisexual OR bigender OR LGB* OR GBL* OR queer ) OR SU ( men who have sex with men OR MSM ) OR SU ( women who have sex with women OR WSW ) OR SU ( men who have sex with both men and women OR MSMW ) | 19,018 |
| #2 | SU China OR Taiwan OR Chinese OR Taiwanese | 89,166 |
| #3 | SU ( Health OR Health Services OR Holistic Health ) OR SU ( Mental Health OR Emotion OR Mental Disorder OR Depression OR Stress OR Stigma OR Discrimination OR Prejudice OR Homophobia OR Resilience OR Self Concept OR Identification OR Gender Identity OR Psychosexual Development ) OR SU ( Physical Health OR Sexual Health OR Reproductive Health OR Sexually Transmitted Diseases OR sexually transmitted infection OR HIV OR Human Immunodeficiency Virus OR Acquired Immunodeficiency Syndrome OR Chlamydia OR Gonorrhea OR Granuloma Inguinale OR Syphilis OR Condylomata Acuminata OR Herpes Genitalis OR Kaposi OR Reproductive Tract Infections OR Female Urogenital Disease OR Male Urogenital Disease OR Sexual Behavior OR Sexual Partner OR Condom OR Libido OR Sexual Dysfunction OR Orgasm OR Violence OR Abuse OR Suicide OR Sex Offense OR sexual compulsory OR sexual addiction OR gender identity violence OR Unsafe Sex OR Sexual Abstinence OR Sexual Harassment ) OR SU ( Quality of Life OR Social Support OR Psychology, Social OR Social Networking OR Marital Status OR Family Relations OR well being OR self esteem OR helpless OR risk behavior OR risk taking behavior OR drug use OR alcohol drinking ) | 1,952,901 |
| #4 | #1 AND #2 AND #3 | 523 |
| #5 | Limited to publication between 2001-2020, Human studies and English language | 421 |


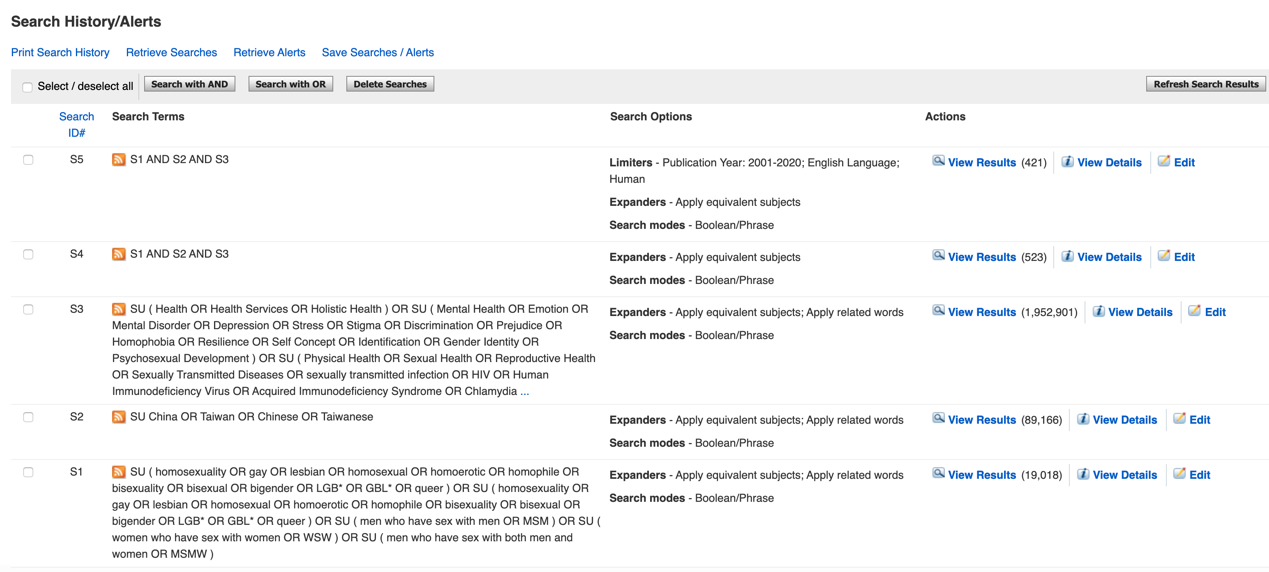


## ScienceDirect

| ScienceDirect – May 8, 2020 | | |
| --- | --- | --- |
| Search | Query | Results |
| #1 | (homosexual OR gay OR lesbian OR bisexual OR men who have sex with men OR women who have sex with women) AND health AND (China OR Taiwan) AND Limited to publication between 2001-2020 | 140 |


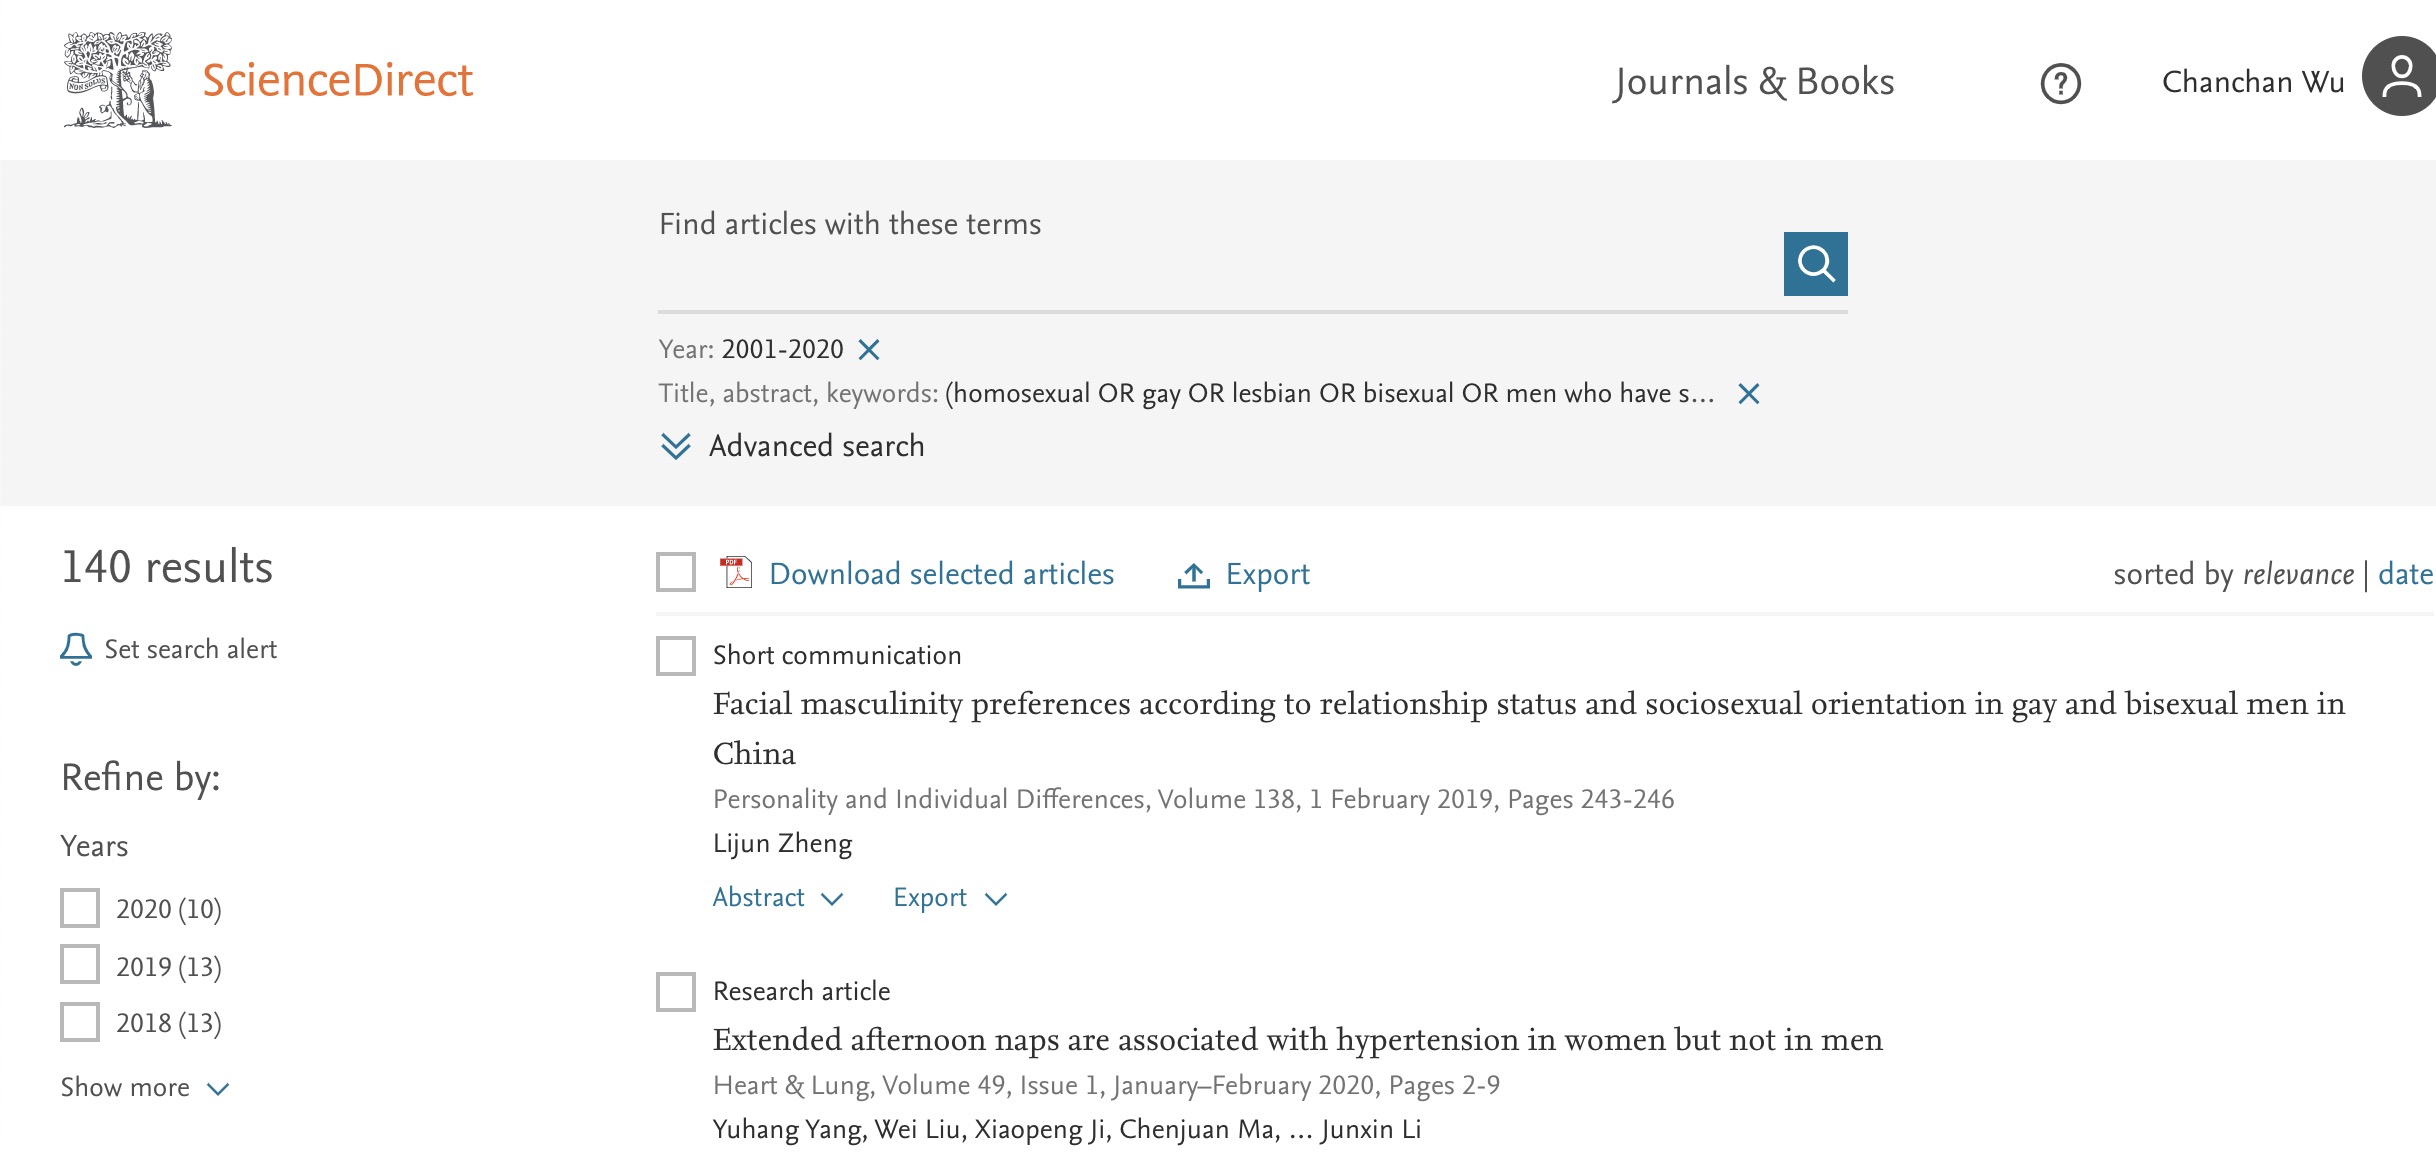


## Social Work Abstracts (via Ovid)

| Social Work Abstracts – May 8, 2020 | | |
| --- | --- | --- |
| Search | Query | Results |
| #1 | (homosexuality or gay or lesbian or homosexual or homoerotic or homophile or bisexuality or bisexual or bigender or LGB* or GBL* or queer or sexual minorit* or men who have sex with men or MSM or women who have sex with women or WSW or (men who have sex with both men and women) or MSMW).mp. [mp=title, abstract, subject heading, heading word] | 1,799 |
| #2 | (China or Hong Kong or Macau or Taiwan or Chinese or Taiwanese).mp. [mp=title, abstract, subject heading, heading word] | 1,039 |
| #3 | (Health or Health Services or Holistic Health or Mental Health or Emotion or Mental Disorder or Depression or Stress or Stigma or Discrimination or Prejudice or Homophobia or Resilience or Self Concept or Identification or Gender Identity or Psychosexual Development).mp. [mp=title, abstract, subject heading, heading word] | 21,706 |
| #4 | (Physical Health or Sexual Health or Reproductive Health or Sexually Transmitted Diseases or sexually transmitted infection or HIV or Human Immunodeficiency Virus or Acquired Immunodeficiency Syndrome or Chlamydia or Gonorrhea or Granuloma Inguinale or Syphilis or Condylomata Acuminata or Herpes Genitalis or Kaposi or Reproductive Tract Infections or Female Urogenital Disease or Male Urogenital Disease or Sexual Behavior or Sexual Partner or Condom or Libido or Sexual Dysfunction or Orgasm or Violence or Abuse or Suicide or Sex Offense or sexual compulsory or sexual addiction or gender identity violence or Unsafe Sex or Sexual Abstinence or Sexual Harassment).mp. [mp=title, abstract, subject heading, heading word] | 10,930 |
| #5 | (Quality of Life or Social Support or Social Psychology or Social Networking or Marital Status or Family Relations or well being or self esteem or helpless or risk behavior or risk taking behavior or drug or alcohol).mp. [mp=title, abstract, subject heading, heading word] | 10,419 |
| #6 | #3 OR #4 OR #5 | 32,789 |
| #7 | #1 AND #2 AND #6 | 15 |
| #8 | Limited to publication between 2001-2020 | 14 |


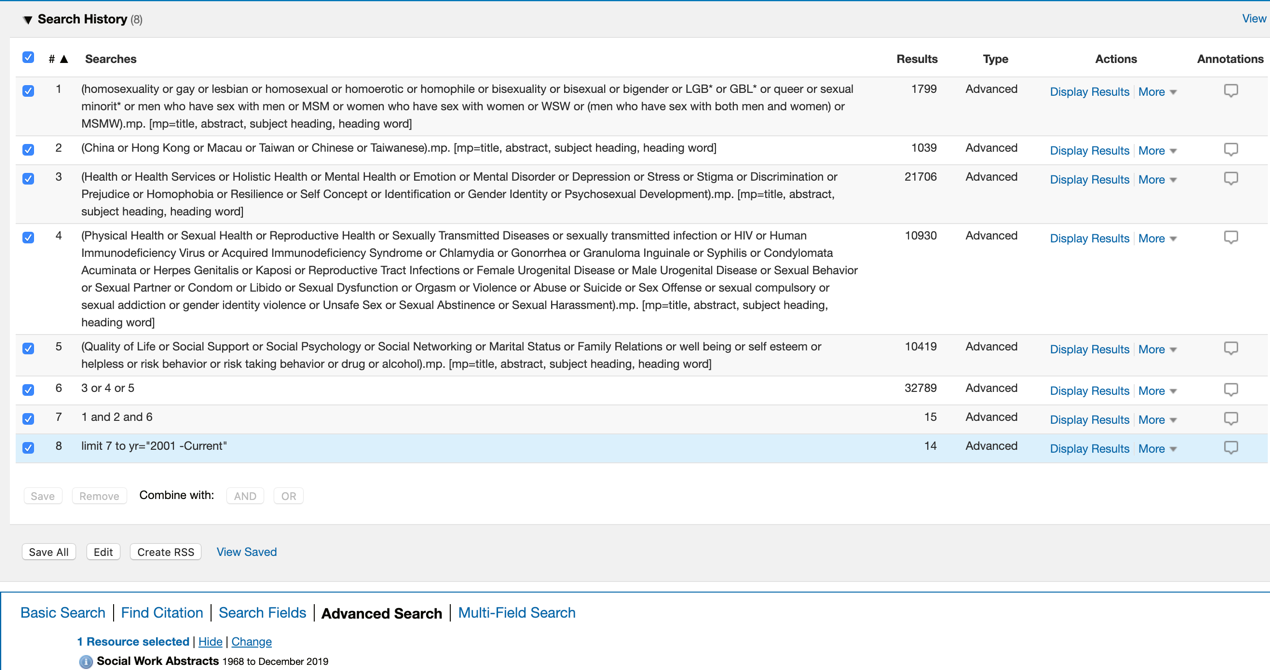


## APA PsycInfo, Dissertations & Theses, Sociological Abstracts via ProQuest

| ProQuest searching of the 5 databases below (May 8, 2020):   1. ProQuest Dissertations & Theses A&I 2. ProQuest Dissertations & Theses Global‎ 3. APA PsycInfo 4. Sociological Abstracts 5. Social Services Abstracts | | |
| --- | --- | --- |
| Search | Query | Results |
| #1 | su(homosexuality OR gay OR lesbian OR homosexual OR homoerotic OR homophile OR bisexuality OR bisexual OR bigender OR LGB* OR GBL* OR queer) OR su(sexual minorit* OR men who have sex with men OR MSM OR women who have sex with women OR WSW OR (men who have sex with both men and women) OR MSMW) | 77,891 |
| #2 | su(China OR Hong Kong Or Macau OR Taiwan OR Chinese OR Taiwanese) | 145,732 |
| #3 | su(Health OR Health Services OR Holistic Health OR Mental Health OR Emotion OR Mental Disorder OR Depression OR Stress OR Stigma OR Discrimination OR Prejudice OR Homophobia OR Resilience OR Self Concept OR Identification OR Gender Identity OR Psychosexual Development) OR su(Physical Health OR Sexual Health OR Reproductive Health OR Sexually Transmitted Diseases OR sexually transmitted infection OR HIV OR Human Immunodeficiency Virus OR Acquired Immunodeficiency Syndrome OR Chlamydia OR Gonorrhea OR Granuloma Inguinale OR Syphilis OR Condylomata Acuminata OR Herpes Genitalis OR Kaposi OR Reproductive Tract Infections OR Female Urogenital Disease OR Male Urogenital Disease OR Sexual Behavior OR Sexual Partner OR Condom OR Libido OR Sexual Dysfunction OR Orgasm OR Violence OR Abuse OR Suicide OR Sex Offense OR sexual compulsory OR sexual addiction OR gender identity violence OR Unsafe Sex OR Sexual Abstinence OR Sexual Harassment) OR su(Quality of Life OR Social Support OR Social Psychology OR Social Networking OR Marital Status OR Family Relations OR well being OR self esteem OR helpless OR risk behavior OR risk taking behavior OR drug use OR alcohol drinking) | 3,171,127 |
| #4 | #1 AND #2 AND #3 | 933 |
| #5 | Limited to publication between 2001-2020 and English language | 853 |


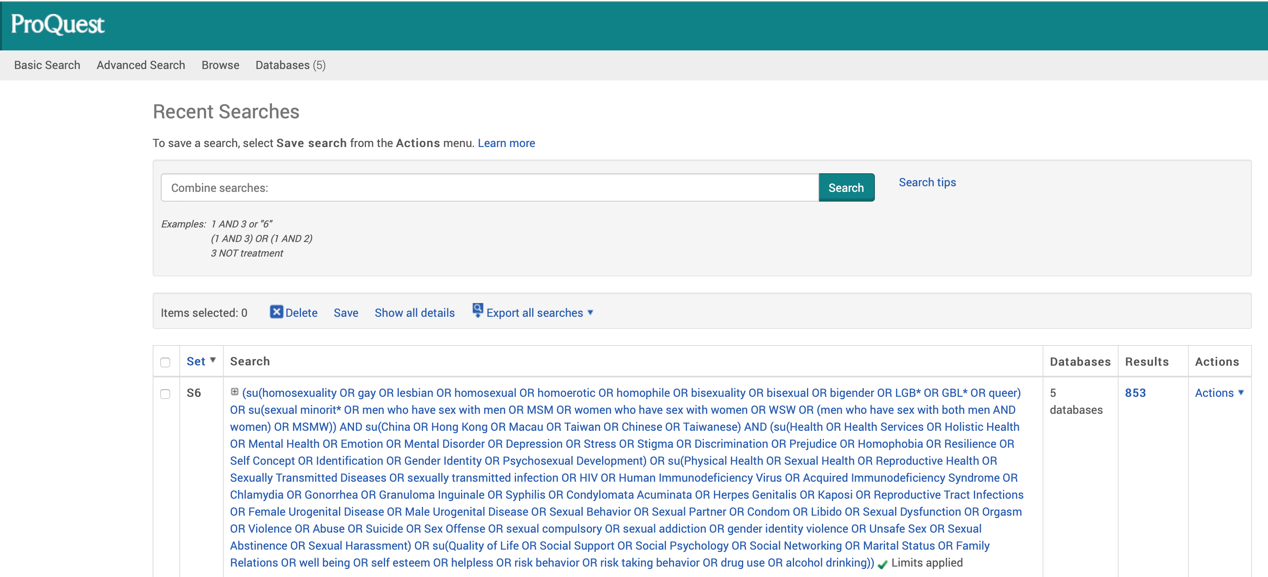


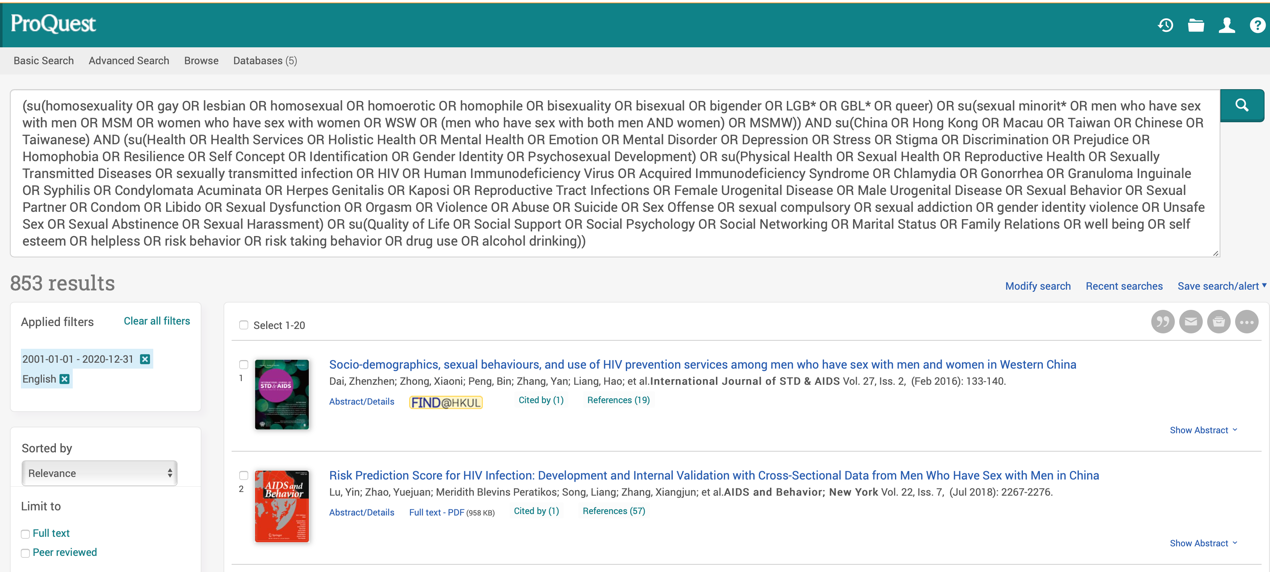


## Scopus

| Scopus – May 8, 2020 | | |
| --- | --- | --- |
| Search | Query | Results |
| #1 | TITLE-ABS-KEY ( homosexuality OR gay OR lesbian OR homosexual OR homoerotic OR homophile OR bisexuality OR bisexual OR bigender OR lgb* OR gbl* OR queer OR sexual AND minorit* OR ( men AND who AND have AND sex AND with AND men ) OR msm OR ( women AND who AND have AND sex AND with AND women ) OR wsw OR ( men AND who AND have AND sex AND with AND both AND men AND women ) OR msmw ) | 39,280 |
| #2 | TITLE-ABS-KEY ( china OR hong AND kong OR macau OR taiwan OR chinese OR taiwanese ) | 283,740 |
| #3 | TITLE-ABS-KEY ( health OR ( health AND services ) OR ( holistic AND health ) OR ( mental AND health ) OR emotion OR ( mental AND disorder ) OR depression OR stress OR stigma OR discrimination OR prejudice OR homophobia OR resilience OR ( self AND concept ) OR identification OR ( gender AND identity ) OR ( psychosexual AND development ) OR ( physical AND health ) OR ( sexual AND health ) OR ( reproductive AND health ) OR ( sexually AND transmitted AND disease ) OR ( sexually AND transmitted AND infection ) OR hiv OR ( human AND immunodeficiency AND virus ) OR ( acquired AND immunodeficiency AND syndrome ) OR chlamydia OR gonorrhea OR ( granuloma AND inguinale ) OR syphilis OR ( condylomata AND acuminata ) OR ( herpes AND genitalis ) OR kaposi OR ( reproductive AND tract AND infection ) OR ( female AND urogenital AND disease ) OR ( male AND urogenital AND disease ) OR ( sexual AND behavior ) OR ( sexual AND partner ) OR condom OR libido OR ( sexual AND dysfunction ) OR orgasm OR violence OR abuse OR suicide OR ( sex AND offense ) OR ( sexual AND compulsory ) OR ( sexual AND addiction ) OR ( gender AND identity AND violence ) OR ( unsafe AND sex ) OR ( sexual AND abstinence ) OR ( sexual AND harassment ) OR ( quality AND of AND life ) OR ( social AND support ) OR ( social AND psychology ) OR ( social AND networking ) OR ( marital AND status ) OR ( family AND relations ) OR ( well AND being ) OR ( self AND esteem ) OR helpless OR ( risk AND behavior ) OR ( risk AND taking AND behavior ) OR ( drug AND use ) OR ( alcohol AND drinking ) ) | 23,635,628 |
| #4 | #1 AND #2 AND #3 | 711 |
| #5 | Limited to publication between 2001-2020 and English language | 622 |


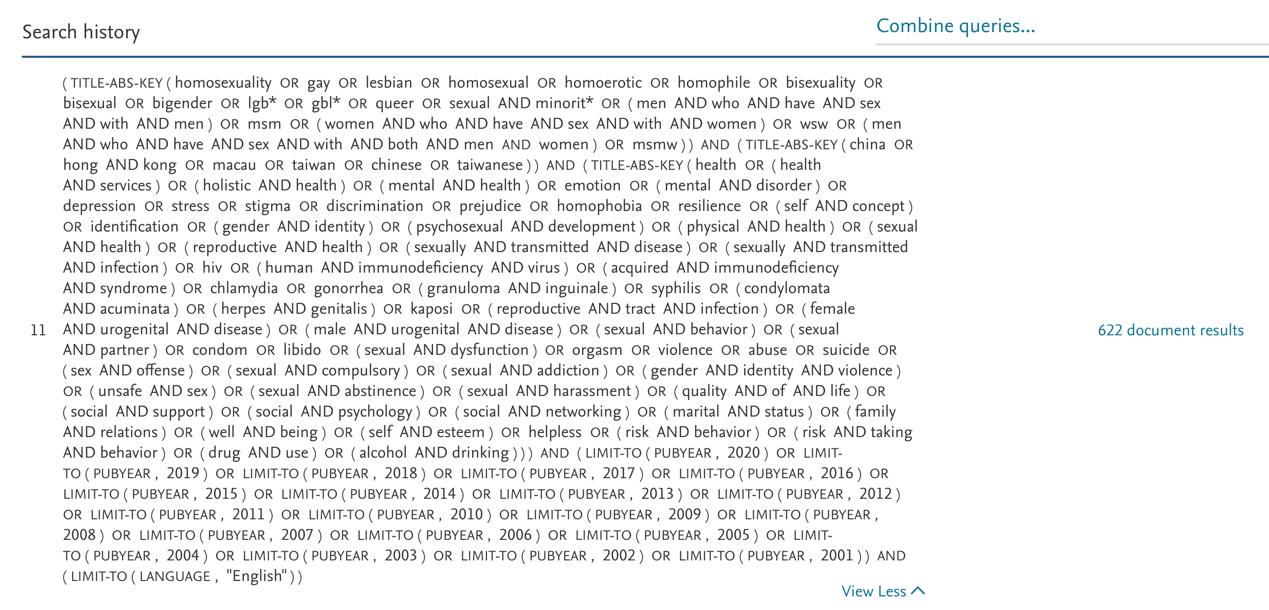


## Cochrane library

| Cochrane library – May 8, 2020 | | | |
| --- | --- | --- | --- |
| Search | Query | Results | |
| #1 | (homosexuality OR gay OR lesbian OR homosexual OR homoerotic OR homophile OR bisexuality OR bisexual OR bigender OR LGB* OR GBL* OR queer OR sexual minorit* OR (men who have sex with men) OR MSM OR (women who have sex with women) OR WSW OR (men who have sex with both men and women) OR MSMW) in Title Abstract Keyword | Cochrane Reviews | 123 |
| Cochrane Protocols | 2 |
| Trials | 3,444 |
| Editorials | 2 |
| Clinical Answers | 1 |
| Total | 3,572 |
| #2 | #1 AND (Health OR (Health Services) OR (Holistic Health) OR (Mental Health OR Emotion) OR (Mental Disorder) OR Depression OR Stress OR Stigma OR Discrimination OR Prejudice OR Homophobia OR Resilience OR (Self Concept) OR Identification OR (Gender Identity) OR (Psychosexual Development) OR (Physical Health) OR (Sexual Health) OR (Reproductive Health) OR (Sexually Transmitted Disease) OR (sexually transmitted infection) OR HIV OR (Human Immunodeficiency Virus) OR (Acquired Immunodeficiency Syndrome) OR Chlamydia OR Gonorrhea OR (Granuloma Inguinale) OR Syphilis OR (Condylomata Acuminata) OR (Herpes Genitalis) OR Kaposi OR (Reproductive Tract Infection) OR (Female Urogenital Disease) OR (Male Urogenital Disease) OR (Sexual Behavior) OR (Sexual Partner) OR Condom OR Libido OR (Sexual Dysfunction) OR Orgasm OR Violence OR Abuse OR Suicide OR (Sex Offense) OR (sexual compulsory) OR (sexual addiction) OR (gender identity violence) OR (Unsafe Sex) OR (Sexual Abstinence) OR (Sexual Harassment) OR (Quality of Life) OR (Social Support) OR (Social Psychology) OR (Social Networking) OR (Marital Status) OR (Family Relations) OR (well being) OR (self esteem) OR helpless OR (risk behavior) OR (risk taking behavior) OR (drug use) OR (alcohol drinking)) in Title Abstract Keyword | Cochrane Reviews | 120 |
| Cochrane Protocols | 2 |
| Trials | 2,983 |
| Editorials | 2 |
| Clinical Answers | 1 |
| Total | 3,108 |
| #3 | #1 AND #2 AND  (China OR Hong Kong Or Macau OR Taiwan OR Chinese OR Taiwanese) in Title Abstract Keyword | Cochrane Reviews | 12 |
| Trials | 124 |
| Total | 136 |
| #4 | #3 with publication data between 2001-2020 | Cochrane Reviews | 12 |
| Trials | 120 |
| Total | 132 |


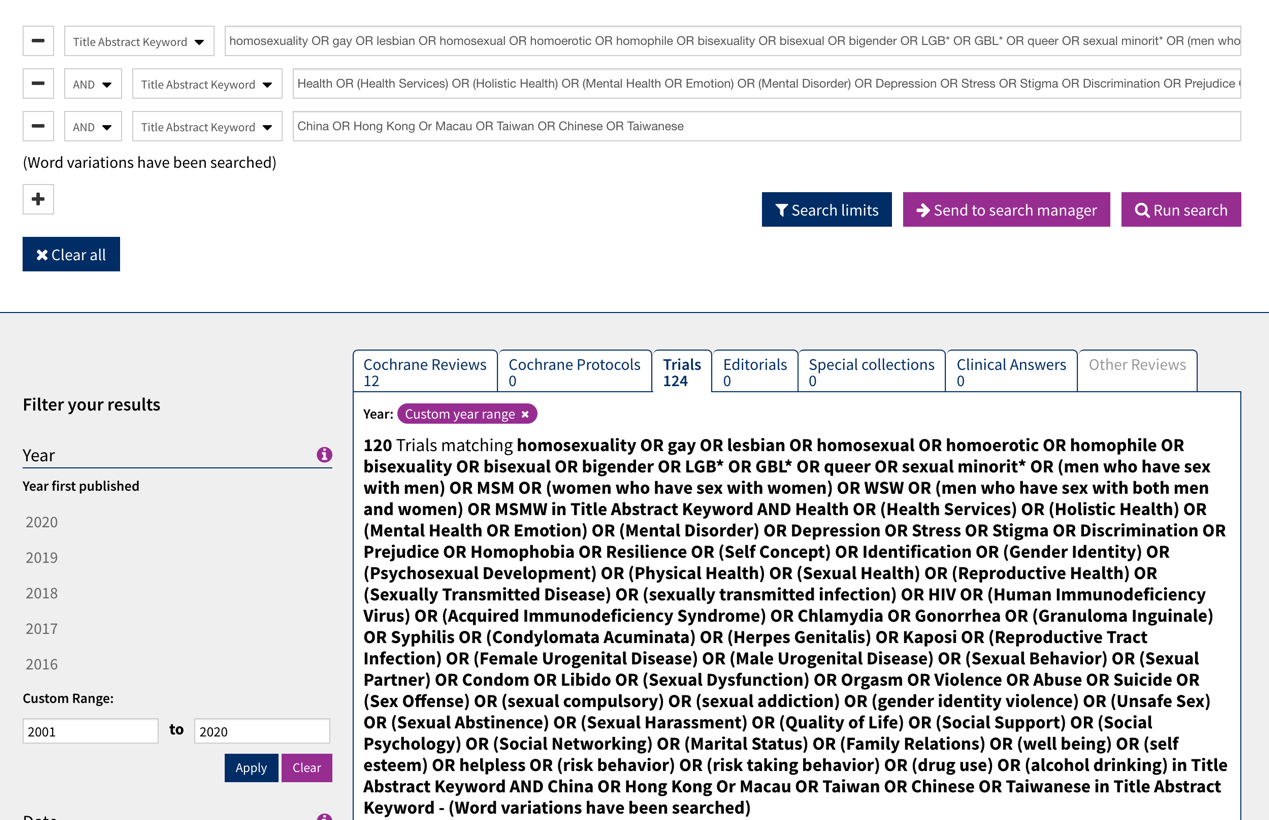


## Joanna Briggs Institute EBP Database (via Ovid)

| JBI EBP – May 12, 2020 | | |
| --- | --- | --- |
| Search | Query | Results |
| #1 | (homosexuality or gay or lesbian or homosexual or homoerotic or homophile or bisexuality or bisexual or bigender or MSM or WSW or MSMW or LGB* or GBL* or queer or sexual minorit* or men who have sex with men or women who have sex with women or (men who have sex with both men and women)).mp. [mp=text, heading word, subject area node, title] | 67 |
| #2 | (China or Chinese or (Taiwan or Taiwanese)).mp. [mp=text, heading word, subject area node, title] | 674 |
| #3 | (Health or Health Service or Holistic Health or (Mental Health or Emotion or Mental Disorder or Depression or Stress or Stigma or Discrimination or Prejudice or Homophobia or Resilience or Self Concept or Identification or Gender Identity or Psychosexual Development) or (Physical Health or Sexual Health or Reproductive Health or Sexually Transmitted Diseases or sexually transmitted infection or HIV or Human Immunodeficiency Virus or Acquired Immunodeficiency Syndrome or Chlamydia or Gonorrhea or Granuloma Inguinale or Syphilis or Condylomata Acuminata or Herpes Genitalis or Kaposi or Reproductive Tract Infections or Female Urogenital Disease or Male Urogenital Disease or Sexual Behavior or Sexual Partner or Condom or Libido or Sexual Dysfunction or Orgasm or Violence or Abuse or Suicide or Sex Offense or sexual compulsory or sexual addiction or gender identity violence or Unsafe Sex or Sexual Abstinence or Sexual Harassment)).mp. [mp=text, heading word, subject area node, title] | 6,537 |
| #4 | #1 and #2 and #3 | 17 |
| #5 | Limit #4 to yr="2001 - 2020" | 17 |


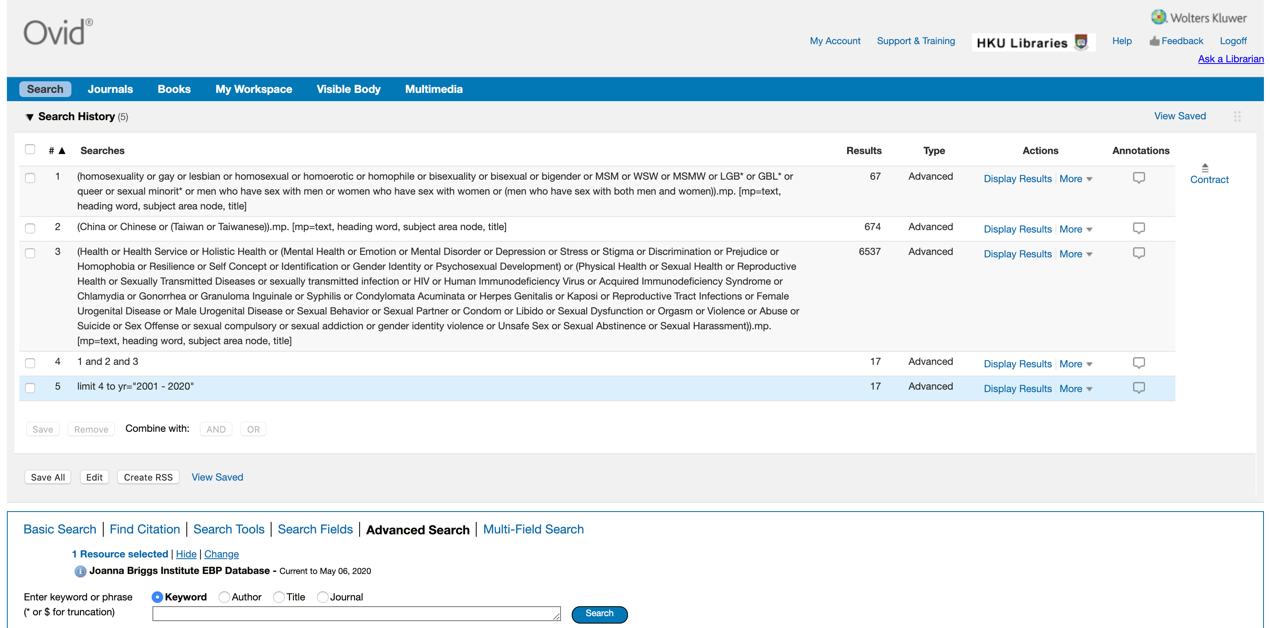


## Update records

### Web of Science


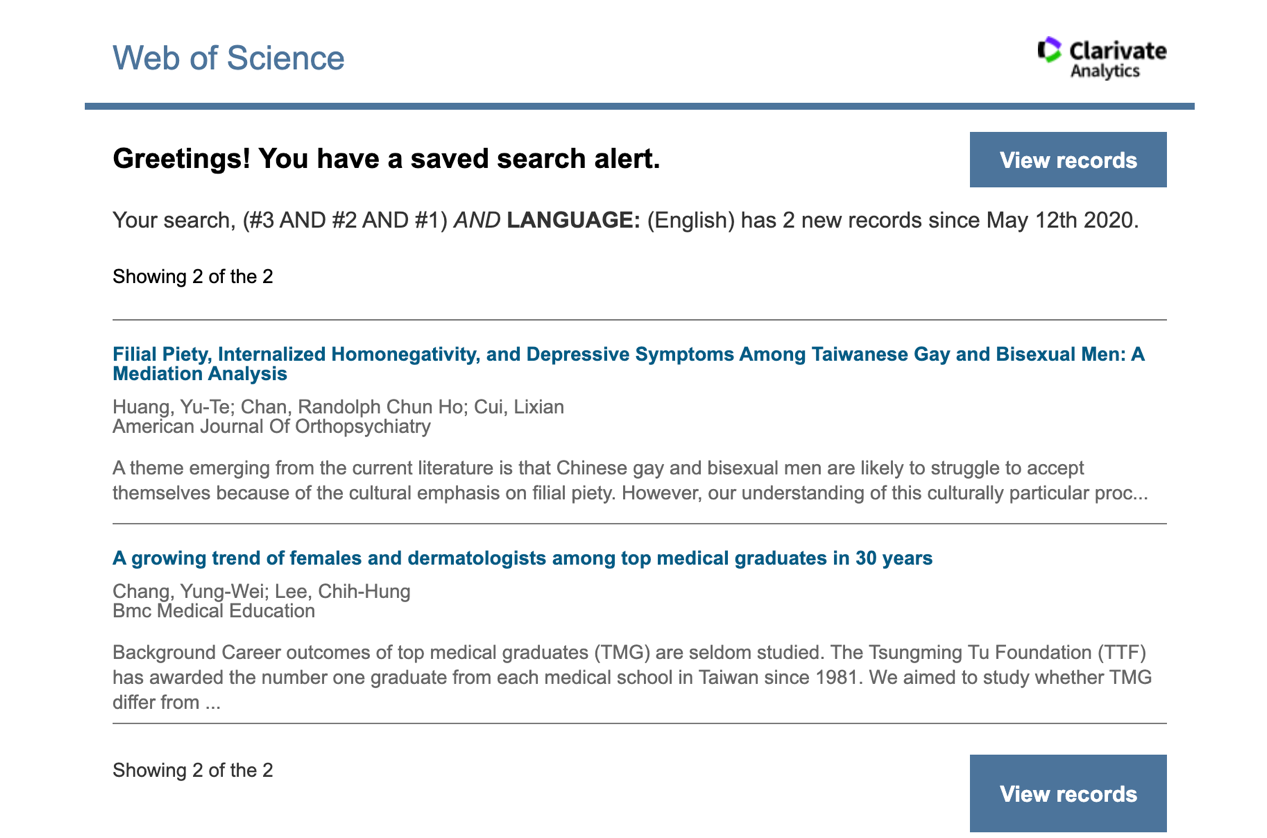


### ProQuest


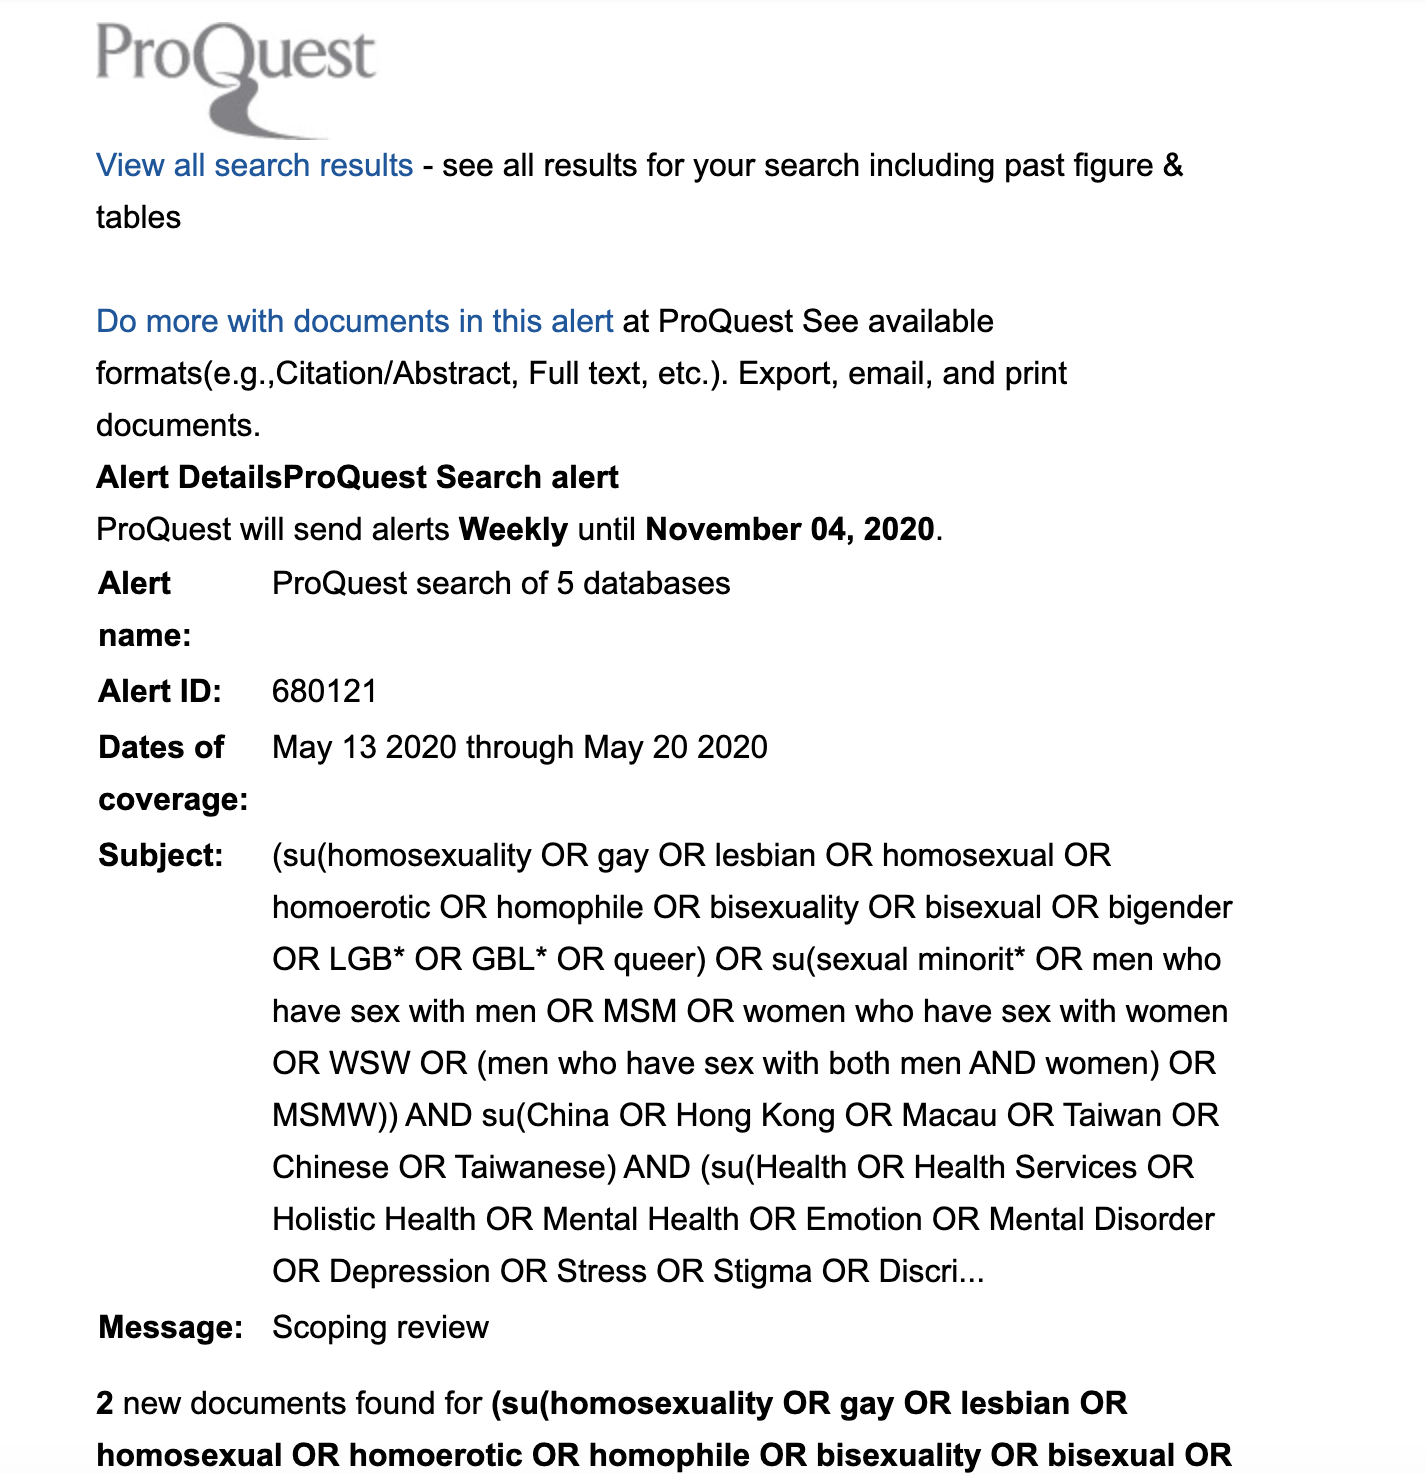


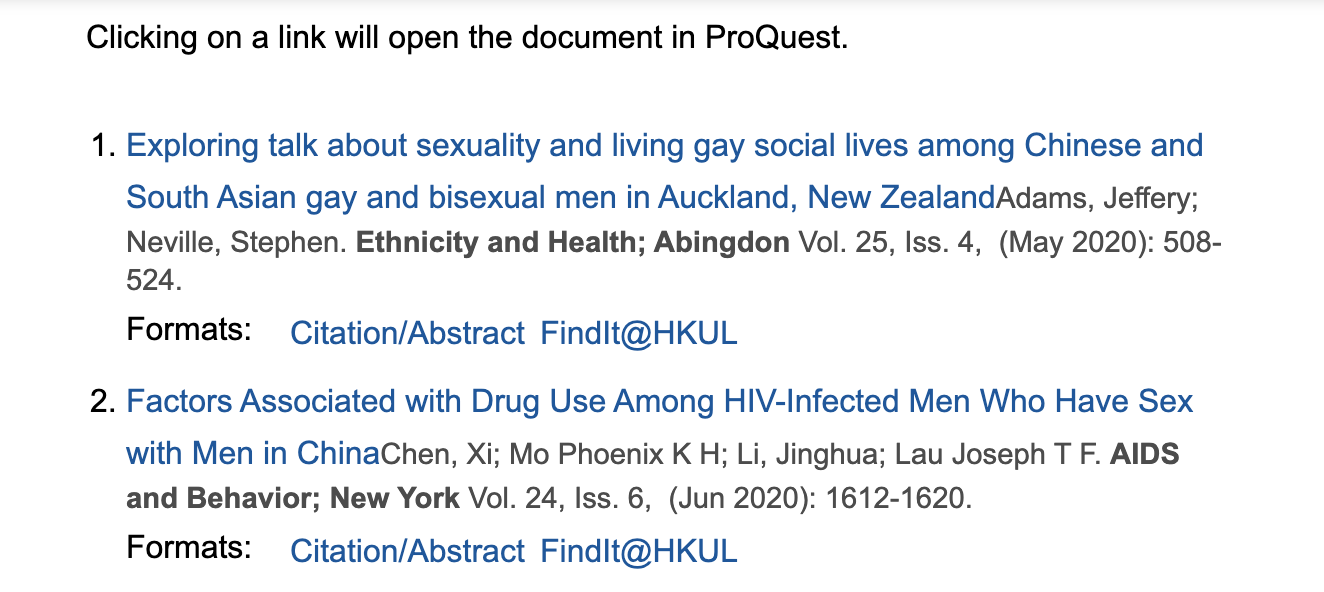


# Syntax of Simplified Chinese literature search

## SinoMed (China Biological Medicine Database)

| SinoMed (China Biological Medicine Database; 中国生物医学文献服务系统) - May 9, 2020 | | |
| --- | --- | --- |
| Search | Query | Results |
| #1 | ("同性恋"[不加权:扩展]) OR "性少数群体"[不加权:扩展] | 988 |
| #2 | 同志"[关键词:智能] OR "同性爱"[关键词:智能] OR "双性恋"[关键词:智能] OR "男男性行为者"[关键词:智能] OR "女女性行为者"[关键词:智能] OR "MSM"[关键词:智能] OR "WSW"[关键词:智能] OR "LGB*"[关键词:智能] | 851 |
| #3 | #1 OR #2 | 1,776 |
| #4 | (((((((((((("健康状况"[不加权:扩展]) OR "健康行为"[不加权:扩展]) OR "卫生服务"[不加权:扩展]) OR "情感"[不加权:扩展]) OR "情绪障碍"[不加权:扩展] OR "情感症状"[不加权:扩展] OR "应激, 心理学"[不加权:扩展] OR "情绪"[不加权:扩展]) OR "物质相关性障碍"[不加权:扩展] OR "精神障碍"[不加权:扩展]) OR "抑郁"[不加权:扩展] OR "抑郁症"[不加权:扩展]) OR "社会歧视"[不加权:扩展]) OR "社会污点"[不加权:扩展]) OR "偏见"[不加权:扩展] OR "性别歧视"[不加权:扩展]) OR "自我概念"[不加权:扩展]) OR "认同(心理学)"[不加权:扩展] OR "社会认同"[不加权:扩展]) OR "自我伤害行为"[不加权:扩展] | 2,285,589 |
| #5 | (((((((((("性传播疾病"[不加权:扩展]) OR "HIV"[不加权:扩展] OR "HIV感染"[不加权:扩展]) OR "肉瘤, 卡波西"[不加权:扩展]) OR "生殖道感染"[不加权:扩展]) OR "女(雌)性泌尿生殖系统疾病"[不加权:扩展] OR "男(雄)性泌尿生殖系统疾病"[不加权:扩展]) OR "性行为"[不加权:扩展] OR "危险性行为"[不加权:扩展] OR "安全性行为"[不加权:扩展]) OR "性伴侣"[不加权:扩展]) OR "避孕套"[不加权:扩展]) OR "性力"[不加权:扩展]) OR "性功能障碍, 生理性"[不加权:扩展] OR "性功能障碍, 心理性"[不加权:扩展]) OR "性欲高潮"[不加权:扩展] | 888,257 |
| #6 | ((((((("生活质量"[不加权:扩展]) OR "暴力"[不加权:扩展] OR "家庭暴力"[不加权:扩展] OR "工作场所暴力"[不加权:扩展] OR "暴力遭遇"[不加权:扩展] OR "身体虐待"[不加权:扩展] OR "亲密伴侣暴力"[不加权:扩展]) OR "社会支持"[不加权:扩展]) OR "心理学, 社会"[不加权:扩展]) OR "社交网络"[不加权:扩展]) OR "性犯罪"[不加权:扩展]) OR "婚姻"[不加权:扩展] OR "婚姻状况"[不加权:扩展] OR "家庭冲突"[不加权:扩展]) OR "家庭关系"[不加权:扩展] | 465,832 |
| #7 | "健康"[关键词:智能] OR "性健康"[关键词:智能] OR "性暴力"[关键词:智能] OR "强迫性性行为"[关键词:智能] OR "心理弹性"[关键词:智能] OR "自尊"[关键词:智能] OR "孤独"[关键词:智能] OR "无助"[关键词:智能] OR "心理弹性"[关键词:智能] | 5,694 |
| #8 | #4 OR #5 OR #6 OR #7 | 3,111,819 |
| #9 | #3 AND #8 | 1,764 |
| #10 | Limited to publication between 2001-2020 | 1,655 |


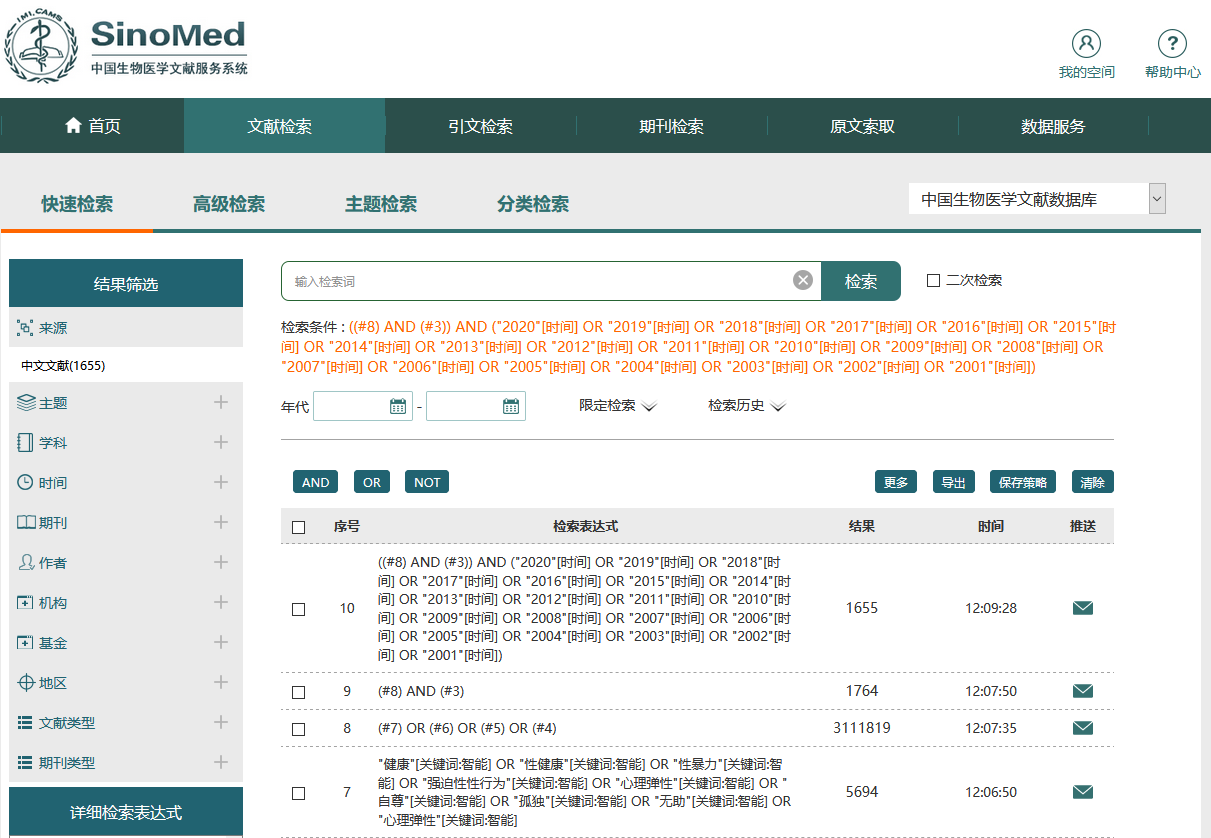


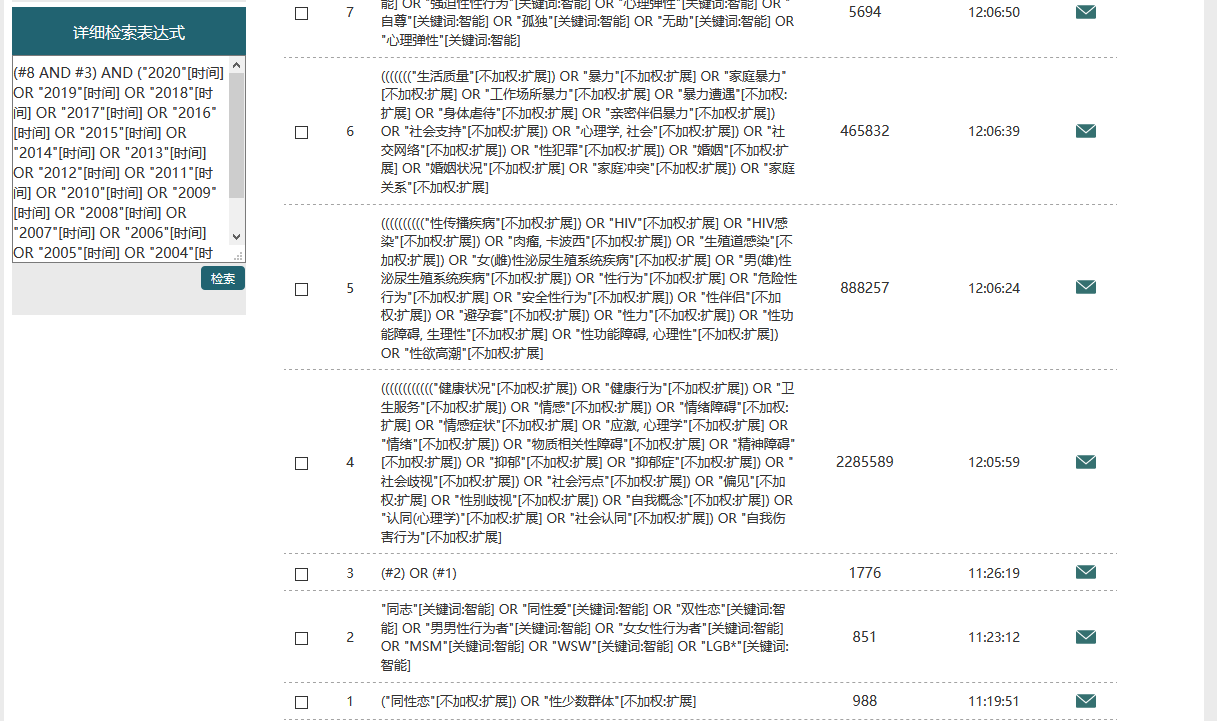


## CNKI (China National Knowledge Infrastructure)

| CNKI (China National Knowledge Infrastructure; 中国知网) – May 9, 2020 | | |
| --- | --- | --- |
| Search | Query | Results |
| #1 | ( ( ( ( ( ( (( 主题=同义词扩展(同性恋) ) 或者 ( 题名=同义词扩展(同性恋) )) 或者 (( 主题=同义词扩展(同性爱) ) 或者 ( 题名=同义词扩展(同性爱) )) ) 或者 ( (( 主题=同义词扩展(双性恋) ) 或者 ( 题名=同义词扩展(双性恋) )) 或者 (( 主题=同义词扩展(性少数) ) 或者 ( 题名=同义词扩展(性少数) )) ) ) 或者 ( (( 主题=同义词扩展(LGB) ) 或者 ( 题名=同义词扩展(LGB) )) 或者 (( 主题=同义词扩展(GBL) ) 或者 ( 题名=同义词扩展(GBL) )) ) ) 或者 ( (( 主题=同义词扩展(男男性行为者) ) 或者 ( 题名=同义词扩展(男男性行为者) )) 或者 (( 主题=同义词扩展(MSM) ) 或者 ( 题名=同义词扩展(MSM) )) ) ) 或者 ( (( 主题=同义词扩展(女女性行为者) ) 或者 ( 题名=同义词扩展(女女性行为者) )) 或者 (( 主题=同义词扩展(WSW) ) 或者 ( 题名=同义词扩展(WSW) )) ) ) 或者 (( 主题=同义词扩展(MSMW) ) 或者 ( 题名=同义词扩展(MSMW) )) ) (模糊匹配),：全部; 数据库：文献 跨库检索 | 10,786 |
| #2 | 在结果中检索 #1 AND  并且 ( ( ( ( ( ( ( (( 主题=中英文扩展(健康) ) 或者 ( 题名=同义词扩展(健康) )) 或者 (( 主题=同义词扩展(性传播疾病) ) 或者 ( 题名=同义词扩展(性传播疾病) )) ) 或者 ( (( 主题=同义词扩展(生活质量) ) 或者 ( 题名=同义词扩展(生活质量) )) 或者 (( 主题=同义词扩展(焦虑) ) 或者 ( 题名=同义词扩展(焦虑) )) ) ) 或者 ( (( 主题=同义词扩展(抑郁) ) 或者 ( 题名=同义词扩展(抑郁) )) 或者 (( 主题=同义词扩展(歧视) ) 或者 ( 题名=同义词扩展(歧视) )) ) ) 或者 ( (( 主题=同义词扩展(孤独) ) 或者 ( 题名=同义词扩展(孤独) )) 或者 (( 主题=同义词扩展(精神障碍) ) 或者 ( 题名=同义词扩展(精神障碍) )) ) ) 或者 ( (( 主题=同义词扩展(性行为) ) 或者 ( 题名=同义词扩展(性行为) )) 或者 (( 主题=同义词扩展(暴力) ) 或者 ( 题名=同义词扩展(暴力) )) ) ) 或者 ( (( 主题=同义词扩展(HIV) ) 或者 ( 题名=同义词扩展(HIV) )) 或者 (( 主题=同义词扩展(心理问题) ) 或者 ( 题名=同义词扩展(心理问题) )) ) ) 或者 ( (( 主题=同义词扩展(社会支持) ) 或者 ( 题名=同义词扩展(社会支持) )) 或者 (( 主题=同义词扩展(自我伤害) ) 或者 ( 题名=同义词扩展(自我伤害) )) ) ) (模糊匹配),：全部; 数据库：文献 跨库检索  检索方式：跨库检索 | 4,594 |
| #3 | 在结果中检索  #2 AND Limited to publication between 2001-2020  并且 发表时间 between (2001-01-01,2020-12-31) | 4,290 |


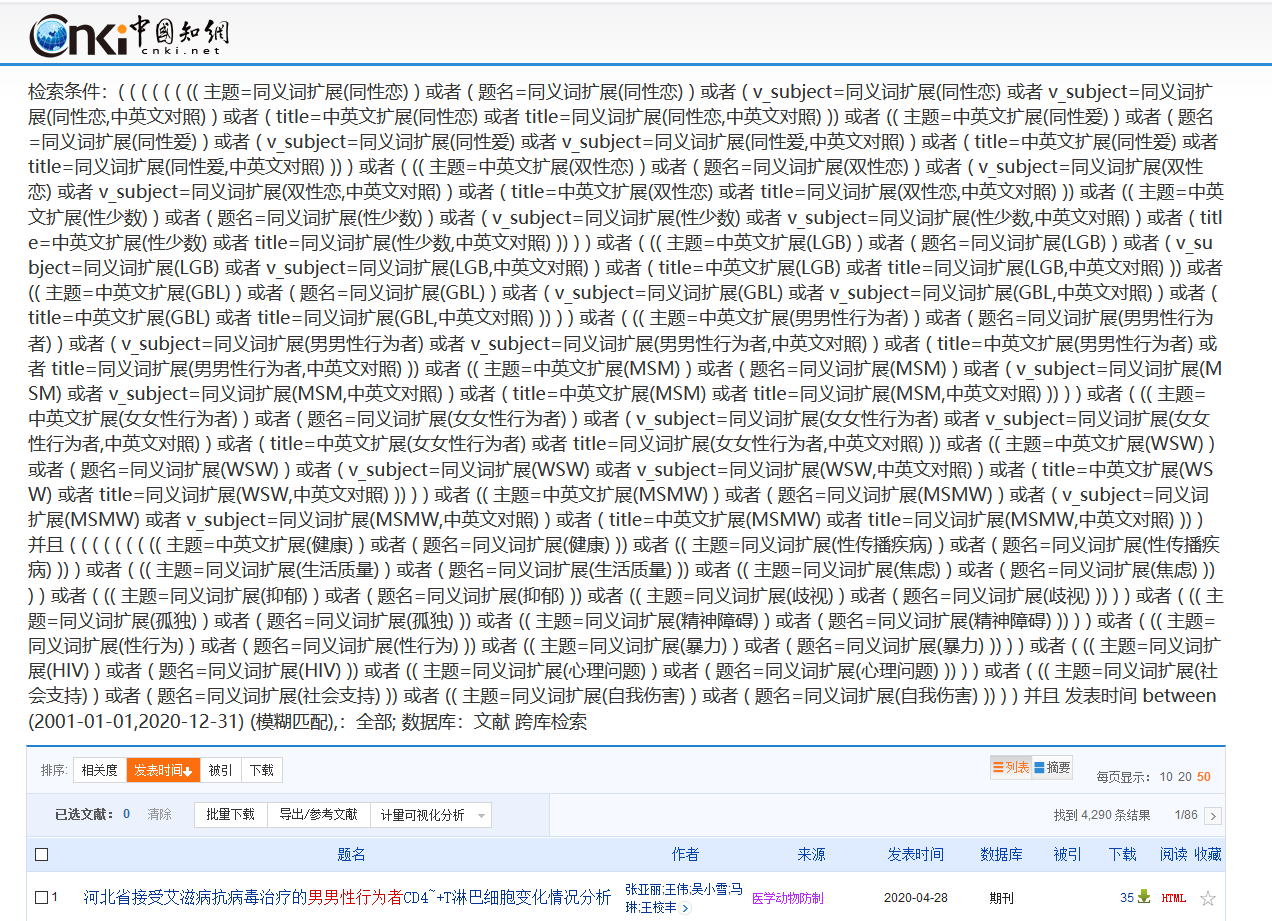


## Wanfang Data

| Wanfang Data (万方数据) – May 9, 2020 | | |
| --- | --- | --- |
| Search | Query | Results |
| #1 | 主题:('同性恋'+'双性恋'+'性少数'+'男男性行为'+'MSM'+'女女性行为'+'WSW'+'LGB')*主题:('健康'+'性行为'+'性传播疾病'+'焦虑'+'抑郁'+'生活质量'+'社会支持'+'HIV'+'STD'+'STI'+'孤独'+'歧视'+'无助'+'污名'+'幸福') | 1,913 |
| #2 | Limited to publication between 2001-2020 | 1,707 |
| #3 | Limited to Chinese language-限定语种为：中文 | 750 |


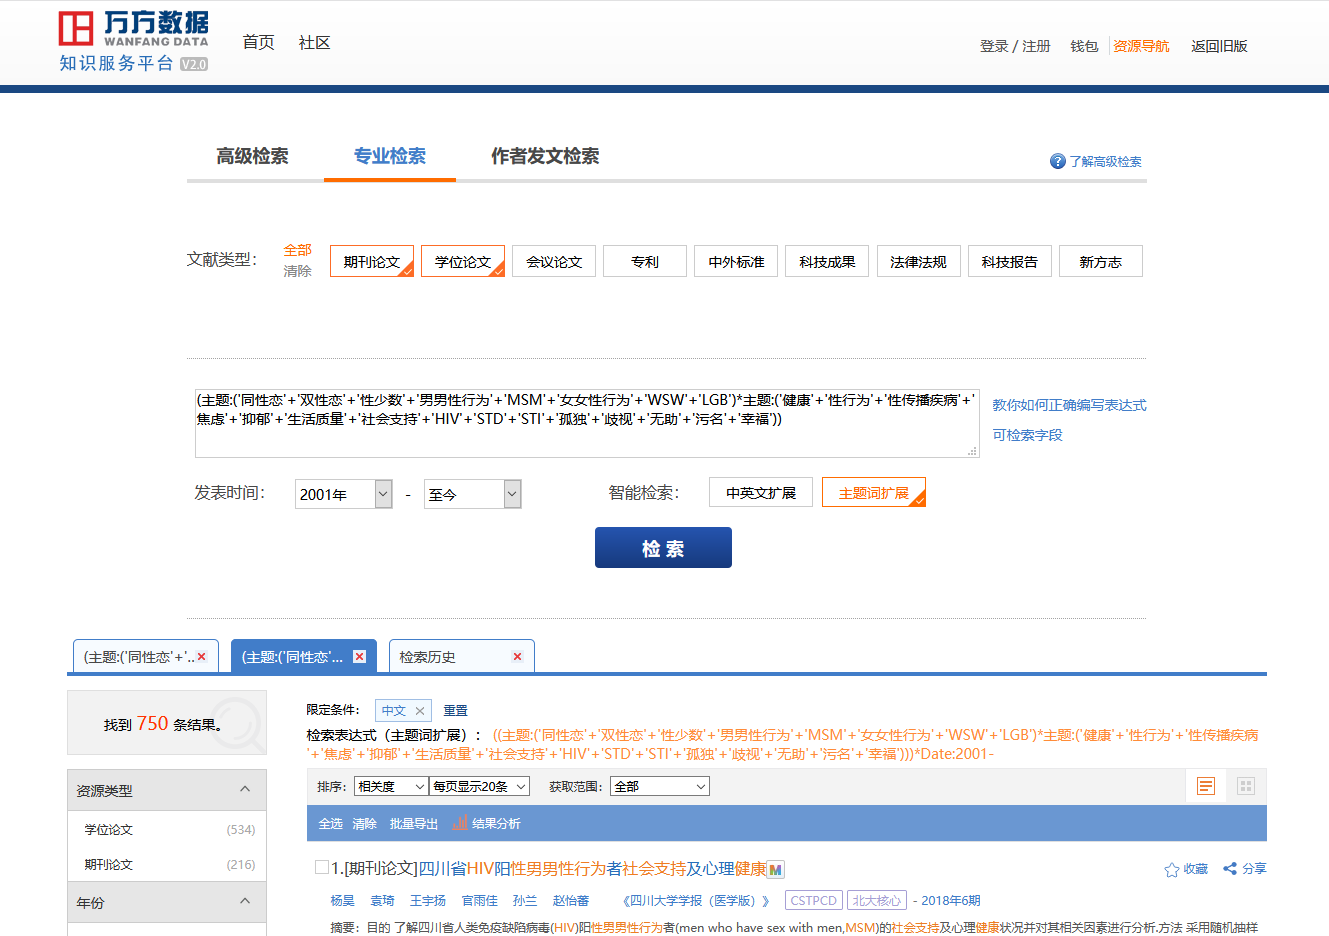


## CQ VIP

| CQ VIP (维普资讯) – May 9, 2020 | | |
| --- | --- | --- |
| Search | Query | Results |
| #1 | ((((((((题名或关键词=健康 OR 题名或关键词=生活质量) OR 题名或关键词=社会支持) OR 题名或关键词=幸福) OR 题名或关键词=希望) OR 题名或关键词=心理弹性) OR ((((((((((题名或关键词=性病 OR 题名或关键词=std) OR 题名或关键词=venereal) OR 题名或关键词=venereal disease) OR 题名或关键词=venereal diseases) OR 题名或关键词=生殖感染) OR 题名或关键词=性传播疾病) OR 题名或关键词=花柳毒淋) OR 题名或关键词=性传播性疾病) OR 题名或关键词=花柳病) OR 题名或关键词=淋病)) OR (((((((((题名或关键词=心理问题 OR 题名或关键词=心理失衡) OR 题名或关键词=焦虑) OR 题名或关键词=抑郁) OR 题名或关键词=孤独) OR 题名或关键词=无助) OR 题名或关键词=污名) OR 题名或关键词=歧视) OR 题名或关键词=暴力) OR 题名或关键词=自我伤害)) AND (((((((((题名或关键词=同性恋 OR 题名或关键词=双性恋) OR 题名或关键词=性少数) OR 题名或关键词=男男性行为者) OR 题名或关键词=men who have sex with men) OR 题名或关键词=msm) OR 题名或关键词=男男同性性行为者) OR 题名或关键词=男男性行为者人群) OR 题名或关键词=女女性行为者) OR 题名或关键词=WSW)) | 720 |
| #2 | Limited to publication between 2001-2020 | 643 |


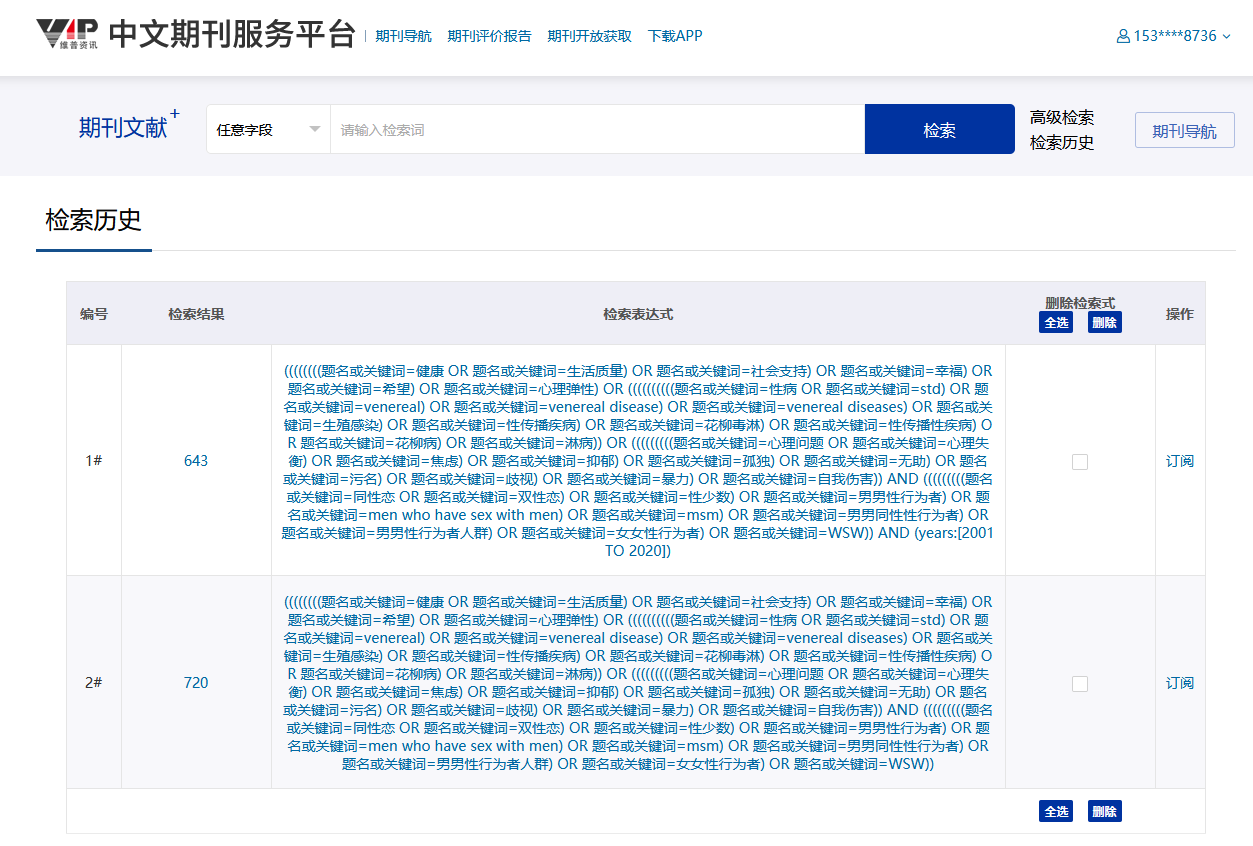


# Syntax of Traditional Chinese literature search

## Taiwan citation index-humanities and social sciences

| Taiwan citation index-humanities and social sciences (臺灣人文及社會科學引文索引資料庫) - May 9, 2020 | | |
| --- | --- | --- |
| Search | Query | Results |
| #1 | "同性戀 or gay or 拉拉".kw or "雙性戀".kw or "性少數 or LGB or GBL".kw or "男男性行為 or MSM".kw or "女女性行為 or WSW".kw and ((jsb1="綜合" or jsb1="人類學" or jsb1="心理學" or jsb1="社會學" or jsb1="傳播學" or jsb1="管理學" or jsb1="體育學" or jsb1="圖書資訊學") and (stype="*") and lg="中文") | 1,133 |
| #2 | "健康 or 生活質量 or 生存質量 or 社會支持 or 幸福".kw or "性傳播疾病 or HIV or STD or STI or 性行為 or 暴力 or 心理疾病 or 焦慮 or 抑鬱 or 孤獨 or 無助 or 自我傷害 or 自殺".kw and ((jsb1="綜合" or jsb1="人類學" or jsb1="心理學" or jsb1="社會學" or jsb1="傳播學" or jsb1="管理學" or jsb1="體育學" or jsb1="圖書資訊學") and (stype="*") and lg="中文") | 47,170 |
| #3 | #1 and #2 | 385 |
| #4 | Limited to publication between 2001-2020 | 321 |


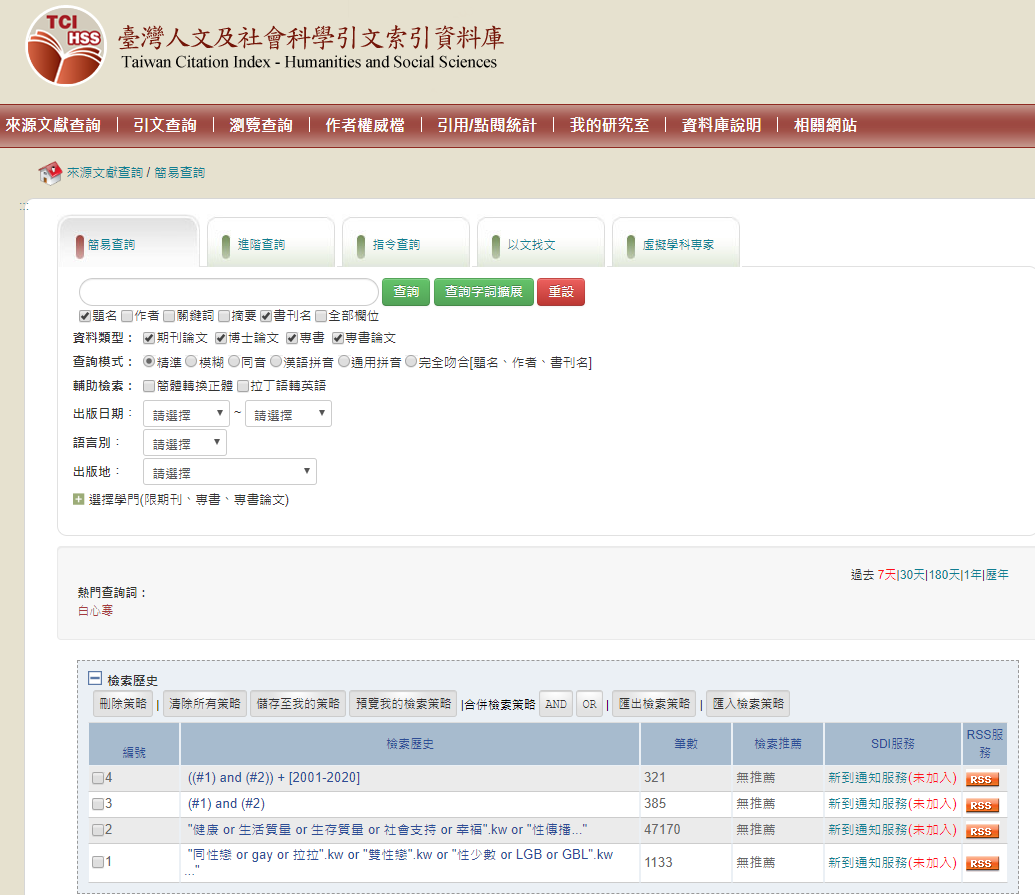


## Index to Taiwan periodical literature system

| Index to Taiwan periodical literature system (臺灣期刊論文索引系統) - May 9, 2020 | |
| --- | --- |
| Search Query | Results |
| (KW=同性戀 OR gay OR 拉拉OR 雙性戀 OR 性少數 OR LGB OR GBL OR 男男性行為 OR MSM OR 女女性行為 OR WSW) [AND] (KW=健康 OR 生活質量 OR 生存質量 OR 社會支持 OR 幸福 OR 性傳播疾病 OR HIV OR 性行為 OR 暴力 OR 心理疾病 OR 焦慮 OR 抑鬱 OR 孤獨 OR 無助 OR 自我傷害 OR 自殺) [AND] (20010101<=PD<=20201231) [AND] (LA=chi) | 41 |


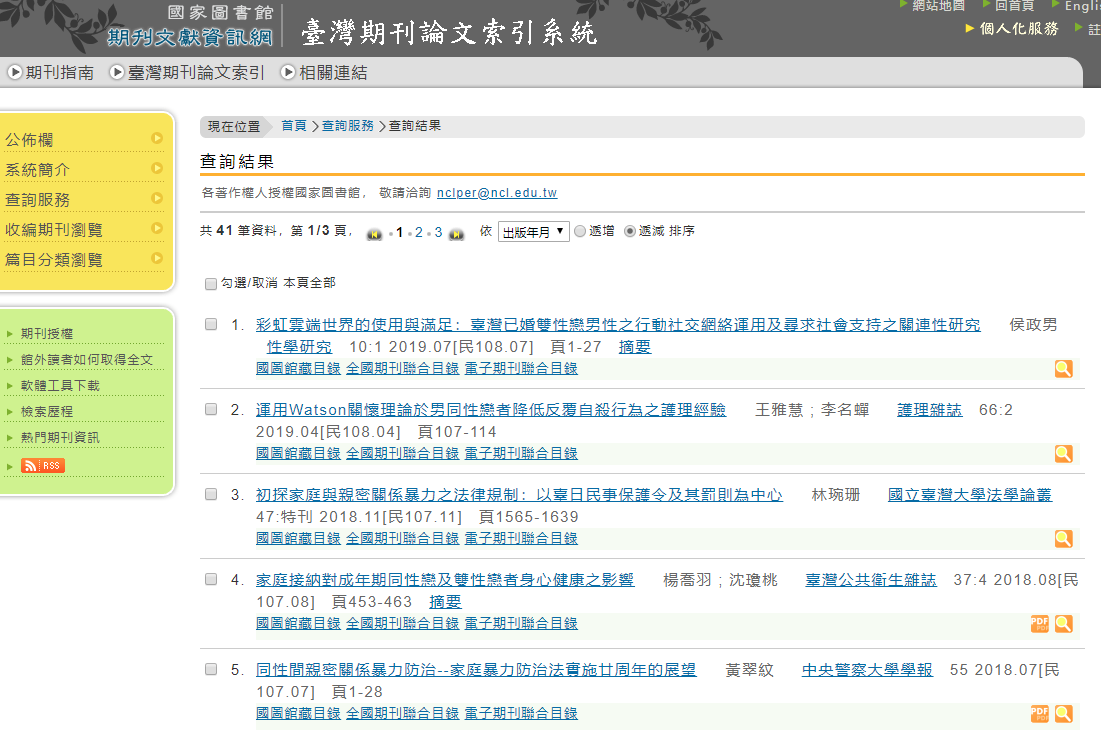


## Synergy of metadata resources in Taiwan

| Synergy of metadata resources in Taiwan (臺灣書目整合查詢系統) - May 9, 2020 | | |
| --- | --- | --- |
| Search | Query | Results |
| #1 | (同性戀)@KW,CL OR (雙性戀)@KW,CL OR (性少數)@KW,CL OR (男男性行為者)@KW,CL OR (MSM)@KW,CL OR (女女性行為者)@KW,CL OR (WSW)@KW,CL AND YR=2001:2020[YR=出版年Pub.Year,KW=關鍵字Keyword,CL=主題Subject] | 1,238 |
| #2 | (健康)@KW,CL OR (生活質量 OR 生存質量 OR 社會支持 OR 幸福)@KW,CL OR (性傳播疾病 OR HIV OR STD OR STI OR 性行為)@KW,CL OR (暴力 OR 自我傷害 OR 自殺)@KW,CL OR (心理疾病 OR 焦慮 OR 抑鬱 OR 孤獨 OR 無助)@KW,CL OR (歧視 OR 污名)@KW,CL OR (愉悅 OR 心理彈性)@KW,CL AND YR=2001:2020[YR=出版年Pub.Year,KW=關鍵字Keyword,CL=主題Subject] | 60,332 |
| #3 | #1 AND #2 | 84 |


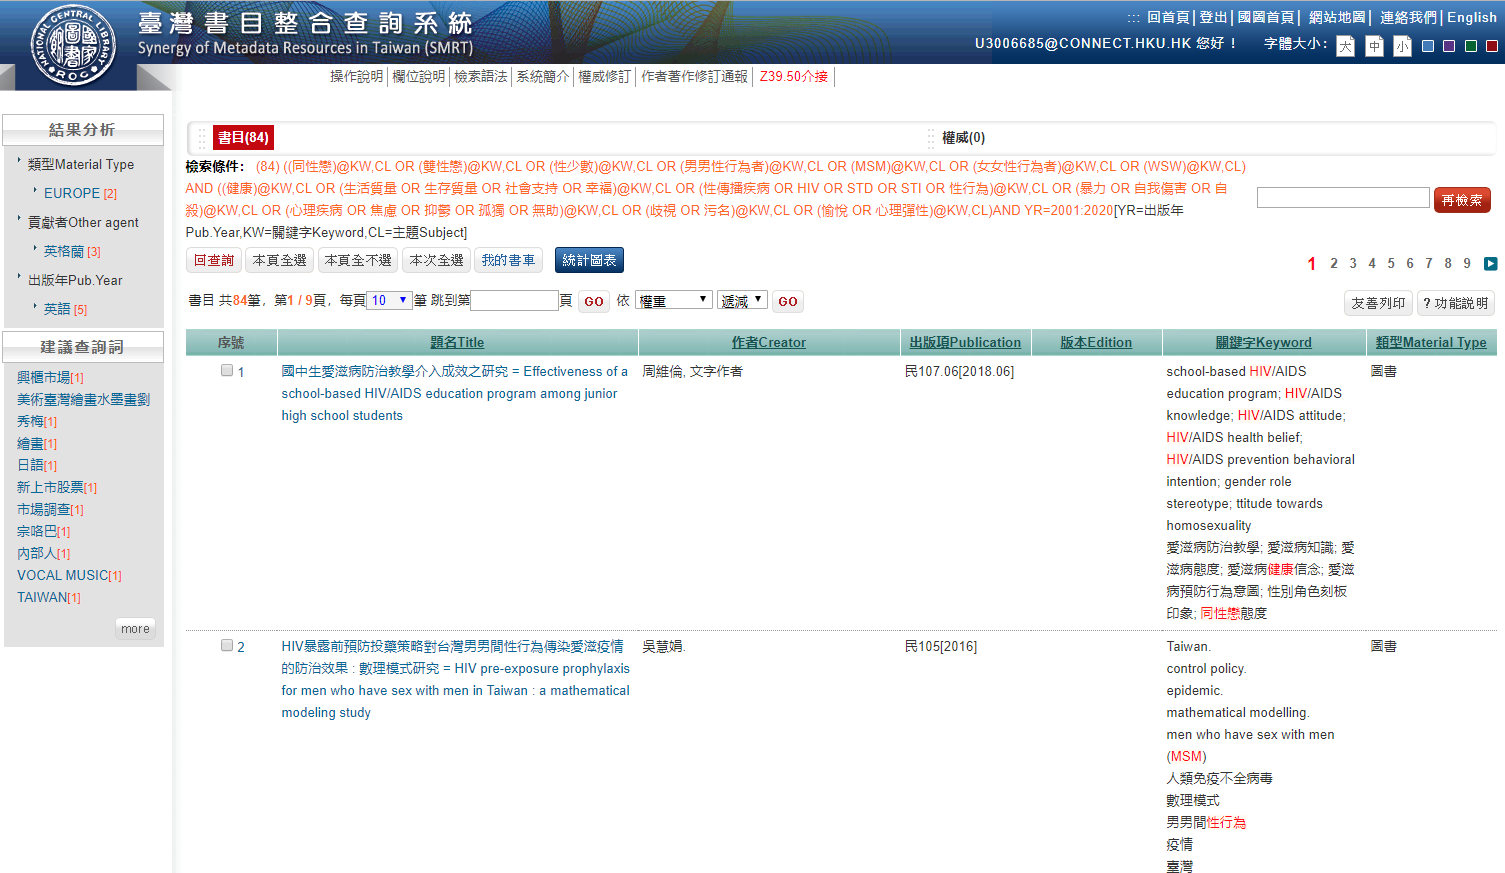


## National Digital Library of Theses and Dissertation in Taiwan

| National Digital Library of Theses and Dissertation in Taiwan (臺灣博碩士論文知識加值系統) - May 9, 2020 | | |
| --- | --- | --- |
| Search | Query | Results |
| #1 | ("同性戀".kw or "雙性戀".kw or "性少數".kw or "男男性行為者".kw or "女女性行為者".kw)/lg="中文",yr="90-109",ty="博士" AND Limited to publication between 2001(民国90年)-2020(民国109), (模糊) Chinese language | 2,902 |
| #2 | ("健康".kw or "生活質量 or 生存質量".kw or "性傳播疾病 or STD or STI".kw or "HIV".kw or "社會支持".kw or "心理問題".kw or "性行為".kw or "暴力".kw or "焦慮 or 抑鬱 or 歧視 or 孤獨".kw or "自我傷害 or 自殺".kw)/lg="中文",yr="90-109",ty="博士" AND Limited to publication between 2001(民国90年)-2020(民国109), (模糊) Chinese language | 7,495 |
| #3 | #1 AND #2 | 1,495 |

*(精確) search, result = 0

**
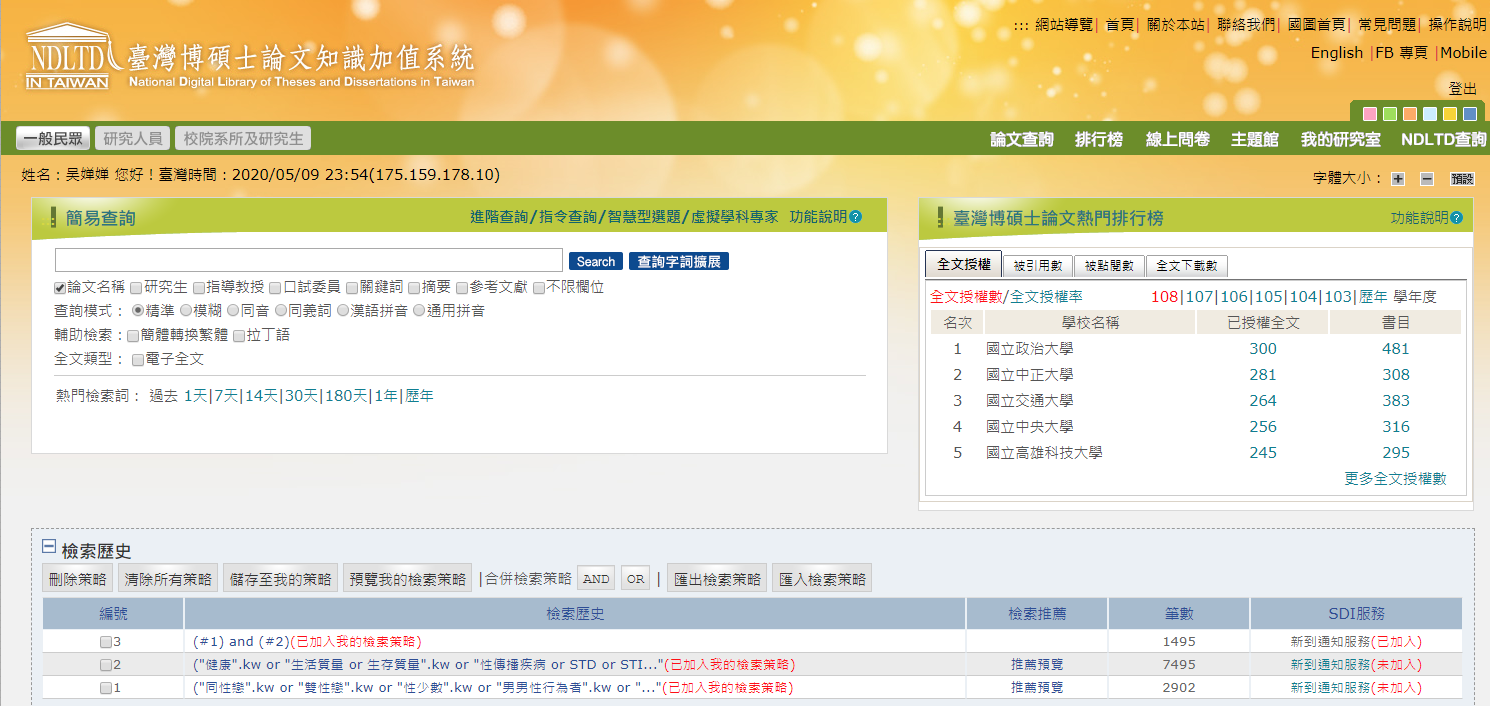
**
