# Supplementary material for: The Holistic Health Status of Chinese Homosexual and Bisexual Adults: A Scoping Review Protocol
Source: Research Square preprint supplement (doi:10.21203/rs.3.rs-107407/v1), 2020-11-18
Supplement: Supplementary file 2 [file 9626f9ecba70aefd47d6f587.docx]

**PRISMA Flow Diagram**

PCC Eligibility:

Population-Concept-Context

Studies included in evidence synthesis (n= )

-English:

-Simplified Chinese:

-Tradition Chinese:

Additional records identified

through other sources (n= )

Records remained after full-text screening (n= )

-English:

-Simplified Chinese:

-Tradition Chinese:

Records remained after abstract screening (n=3605)

-English: 976

-Simplified Chinese: 2588

-Tradition Chinese:41

Excluded referring to PCC eligibility

Excluded (n=5655)

- Not PCC-related: 4892

- Not scientific publications: 382

- Others: 381

Records remained after title screening (n=4929)

-English: 1313

-Simplified Chinese: 3513

-Tradition Chinese: 103

Excluded (n=1324)

- Not Population-related: 629

- Not Health-related: 547

- Not Context-related: 97

- Others: 51

Traditional Chinese (n=1941)

-Taiwan citation index-humanities and social sciences: 321

-Index to Taiwan periodical literature system: 41

-Synergy of metadata resources in Taiwan: 84

-National Digital Library of Theses and Dissertation in Taiwan: 1495

Simplified Chinese (n=7338)

-SinoMed (China Biological Medicine Database): 1655

-CNKI (China National Knowledge Infrastructure): 4290

-Wanfang Data: 750

-CQ VIP: 643

Records remained after duplicates removed (n=10584, exclude 4227)

English Publications: 2955; Simplified Chinese Publications: 5696; Traditional Chinese Publications: 1933

Chinese Databases (n=9279)

-PubMed: 1213

-Web of Science: 2106

-CINAHL Plus: 421

-ScienceDirect: 140

-Social Work Abstracts: 14

-5 databases via ProQuest: 853

-Scopus: 622

-Cochrane library: 132

-JBI EBP: 17

+Updates until 31 May: 14

English Databases (n=5532)

## Screening

## Eligibility

## Included

## Identification
