# Supplementary material for: The Holistic Health Status of Chinese Homosexual and Bisexual Adults: A Scoping Review Protocol
Source: Research Square preprint supplement (doi:10.21203/rs.3.rs-107407/v1), 2020-11-18
Supplement: Supplementary file 4 [file f4c90e5241c27e68e65b77e5.docx]

**Additional file** **3: Pilot search in PubMed and SinoMed**

**In PubMed (March 2020)**

| **PCC** | **Step** | **Search query using MeSH or Title/Abstract** |
| --- | --- | --- |
| **Population:**  Homosexual | #1 | [MeSH]   1. **Homosexuality** 2. **Sexual and Gender Minorities** |
| #2 | [Title/Abstract]   1. **Gay** 2. **MSM** OR **Men Who Have Sex with Men** 3. **Lesbian** 4. **WSW** OR **Women Who Have Sex with Women** |
| **Context:**  Chinese | #3 | [MeSH]   1. **China** *(including)*  - Hong Kong - Macau  1. **Taiwan** |
| [Title/Abstract]   1. **Chinese** 2. **Taiwanese** |
|  | #4 | (#1 OR #2) AND #3 |
| **Concept:**  Health  -Overview | #5 | [MeSH]   1. **Health** *(including)*  - Holistic Health - Mental Health - Sexual Health - Reproductive Health - Physical Fitness  1. **Health Services** *(including)*  - Mental Health Services - Nursing Care - Nursing Services - Personal Health Services - Reproductive Health Services - Social Work - Women’s Health Services |
| Mental health  -Supplementary | #6 | [MeSH]   1. **Emotions** *(including)*  - Anxiety - [Anger](https://www.ncbi.nlm.nih.gov/mesh/68000786) - [Fear](https://www.ncbi.nlm.nih.gov/mesh/68005239) - [Happiness](https://www.ncbi.nlm.nih.gov/mesh/68006240) - [Hate](https://www.ncbi.nlm.nih.gov/mesh/68006252) - Hope - [Loneliness](https://www.ncbi.nlm.nih.gov/mesh/68008132) - [Love](https://www.ncbi.nlm.nih.gov/mesh/68008149) - [Pleasure](https://www.ncbi.nlm.nih.gov/mesh/68057181) - [Psychological Distress](https://www.ncbi.nlm.nih.gov/mesh/2030837) - [Sadness](https://www.ncbi.nlm.nih.gov/mesh/2028220)  1. **Social Stigma** 2. **Social Discrimination** 3. **Prejudice** *(including)*  - Homophobia  1. **Resilience, Psychological** 2. **Self Concept** 3. **Gender Identity** 4. **Psychosexual Development** |
| Sexual health  -Supplementary | #7 | [MeSH]   1. **Sexually Transmitted Diseases** *(including)*  - HIV Infections - Chlamydia Infections - Chancroid - Gonorrhea - Granuloma Inguinale - Syphilis - Condylomata Acuminata - Herpes Genitalis - Acquired Immunodeficiency Syndrome  1. **HIV** (Human Immunodeficiency Virus) 2. **Sarcoma, Kaposi** 3. **Sexual Behavior** *(including)*  - Safe Sex - Unsafe Sex - Sex Work (Prostitution) - Sexual Abstinence - Sexual Harassment  1. **Sexual Partners** 2. **Condoms** 3. **Condoms, Female** 4. **Libido** 5. **Sexual Dysfunction, Physiological** 6. **Sexual Dysfunction, Psychological** 7. **Orgasm** 8. **Violence** *(including)*  - Adverse Childhood Experiences - Domestic Violence - Gender-Based Violence - Intimate Partner Violence - Physical Abuse - Rape - Workplace Violence  1. **Sex Offenses** *(including)*  - [Child Abuse, Sexual](https://www.ncbi.nlm.nih.gov/mesh/68002650) - [Rape](https://www.ncbi.nlm.nih.gov/mesh/68011902) |
| Social Well-being  -Supplementary | #8 | [MeSH]   1. **Quality of Life** 2. **Social Support** 3. **Psychology, Social** 4. **Social Networking** (+Online) 5. **Family Relations** 6. **Marriage** |
|  | #9 | #5 OR #6 OR #7 OR #8 |
| Results: 1006 | #10 | #4 AND #9 |
|  | #11 | Exclusion Other animals |
|  | #12 | Limit Publication dates:  From 2001/01/01 to 2020/03/31 |
| **Records retrieved: 997** | **Search details in PubMed**  (((((((((Gay[Title/Abstract] OR Lesbian[Title/Abstract])) OR (MSM[Title/Abstract] OR Men Who Have Sex with Men[Title/Abstract])) OR (WSW[Title/Abstract] OR Women Who Have Sex with Women[Title/Abstract]))) AND (("Homosexuality"[Mesh]) OR "Sexual and Gender Minorities"[Mesh]))) AND ((((China[MeSH Terms]) OR Taiwan[MeSH Terms]) OR Chinese[Title/Abstract]) OR Taiwanese[Title/Abstract]))) AND (((((("Health"[Mesh]) OR "Health Services"[Mesh])) OR (((((((("Emotions"[Mesh]) OR "Social Stigma"[Mesh]) OR "Social Discrimination"[Mesh]) OR "Prejudice"[Mesh]) OR "Resilience, Psychological"[Mesh]) OR "Self Concept"[Mesh]) OR "Gender Identity"[Mesh]) OR "Psychosexual Development"[Mesh])) OR ((((((((((("Sexually Transmitted Diseases"[Mesh]) OR "HIV"[Mesh]) OR "Sarcoma, Kaposi"[Mesh]) OR "Sexual Behavior"[Mesh]) OR "Sexual Partners"[Mesh]) OR ( "Condoms"[Mesh] OR "Condoms, Female"[Mesh] )) OR "Libido"[Mesh]) OR ( "Sexual Dysfunction, Physiological"[Mesh] OR "Sexual Dysfunctions, Psychological"[Mesh] )) OR "Orgasm"[Mesh]) OR "Violence"[Mesh]) OR "Sex Offenses"[Mesh])) OR (((((("Quality of Life"[Mesh]) OR "Social Support"[Mesh]) OR "Psychology, Social"[Mesh]) OR "Social Networking"[Mesh]) OR "Family Relations"[Mesh]) OR "Marriage"[Mesh])) AND ( ( "2001/01/01"[PDat] : "2020/03/31"[PDat] ) AND Humans[Mesh]) | |

**In SinoMed (China Biological Medicine Database) (April 2020)**

| **Step** | **Search query** | **Results** |
| --- | --- | --- |
| #1 | ("同性恋"[不加权:扩展]) OR "性少数群体"[不加权:扩展] | 988 |
| #2 | 同志"[关键词:智能] OR "同性爱"[关键词:智能] OR "双性恋"[关键词:智能] OR "男男性行为者"[关键词:智能] OR "女女性行为者"[关键词:智能] OR "MSM"[关键词:智能] OR "WSW"[关键词:智能] OR "LGB*"[关键词:智能] | 851 |
| #3 | #1 OR #2 | 1,776 |
| #4 | (((((((((((("健康状况"[不加权:扩展]) OR "健康行为"[不加权:扩展]) OR "卫生服务"[不加权:扩展]) OR "情感"[不加权:扩展]) OR "情绪障碍"[不加权:扩展] OR "情感症状"[不加权:扩展] OR "应激, 心理学"[不加权:扩展] OR "情绪"[不加权:扩展]) OR "物质相关性障碍"[不加权:扩展] OR "精神障碍"[不加权:扩展]) OR "抑郁"[不加权:扩展] OR "抑郁症"[不加权:扩展]) OR "社会歧视"[不加权:扩展]) OR "社会污点"[不加权:扩展]) OR "偏见"[不加权:扩展] OR "性别歧视"[不加权:扩展]) OR "自我概念"[不加权:扩展]) OR "认同(心理学)"[不加权:扩展] OR "社会认同"[不加权:扩展]) OR "自我伤害行为"[不加权:扩展] | 2,285,589 |
| #5 | (((((((((("性传播疾病"[不加权:扩展]) OR "HIV"[不加权:扩展] OR "HIV感染"[不加权:扩展]) OR "肉瘤, 卡波西"[不加权:扩展]) OR "生殖道感染"[不加权:扩展]) OR "女(雌)性泌尿生殖系统疾病"[不加权:扩展] OR "男(雄)性泌尿生殖系统疾病"[不加权:扩展]) OR "性行为"[不加权:扩展] OR "危险性行为"[不加权:扩展] OR "安全性行为"[不加权:扩展]) OR "性伴侣"[不加权:扩展]) OR "避孕套"[不加权:扩展]) OR "性力"[不加权:扩展]) OR "性功能障碍, 生理性"[不加权:扩展] OR "性功能障碍, 心理性"[不加权:扩展]) OR "性欲高潮"[不加权:扩展] | 888,257 |
| #6 | ((((((("生活质量"[不加权:扩展]) OR "暴力"[不加权:扩展] OR "家庭暴力"[不加权:扩展] OR "工作场所暴力"[不加权:扩展] OR "暴力遭遇"[不加权:扩展] OR "身体虐待"[不加权:扩展] OR "亲密伴侣暴力"[不加权:扩展]) OR "社会支持"[不加权:扩展]) OR "心理学, 社会"[不加权:扩展]) OR "社交网络"[不加权:扩展]) OR "性犯罪"[不加权:扩展]) OR "婚姻"[不加权:扩展] OR "婚姻状况"[不加权:扩展] OR "家庭冲突"[不加权:扩展]) OR "家庭关系"[不加权:扩展] | 465,832 |
| #7 | "健康"[关键词:智能] OR "性健康"[关键词:智能] OR "性暴力"[关键词:智能] OR "强迫性性行为"[关键词:智能] OR "心理弹性"[关键词:智能] OR "自尊"[关键词:智能] OR "孤独"[关键词:智能] OR "无助"[关键词:智能] OR "心理弹性"[关键词:智能] | 5,694 |
| #8 | #4 OR #5 OR #6 OR #7 | 3,111,819 |
| #9 | #3 AND #8 | 1,764 |
| #10 | Limited to publication between 2001-2020 | 1,655 |
